# Supplementary material for: COVID-19 Lockdown and Lifestyles – A Narrative Review
Source: Preprints.org preprint supplement (doi:10.20944/preprints202011.0532.v2), 2021-03-15
Supplement: Supplementary file 1 [file supplementary]

**Supplementary Material 1:**

SANRA—a scale for the quality assessment of narrative review articles

1. Justification of the article’s importance of the readership – Pages 4-5
2. Statement of concrete aims or formulation of questions – Pages 4-5
3. Description of the literature search – Pages 5-7
4. Referencing – Pages 4-27
5. Scientific reasoning – Pages 7-27
6. Appropriate presentation of data – Pages 7-21

**Supplementary Material 2:**

**Search results**

COVID-19 AND (lifestyle OR dietary habits OR physical activity OR sleep OR tobacco OR alcohol OR substance OR stress OR relationships) AND (lockdown OR quarantine OR isolation).

| Database | Date | Number of articles retrieved |
| --- | --- | --- |
| PubMed | 30 September 2020 | 1,857 |
| 31 January 2021 | 2,322 |
| WHO Global COVID-19 database | 30 September 2020 | 2,191 |

Total articles included: 649

**Supplementary Material 3: Included Studies**

1. Abbas AM, Kamel MM. Dietary habits in adults during quarantine in the context of COVID-19 pandemic. Obes Med. 2020;19:100254.

2. Abujilban S, Mrayan L, Hamaideh S, Obeisat S, Damra J. Intimate Partner Violence Against Pregnant Jordanian Women at the Time of COVID-19 Pandemic's Quarantine. J Interpers Violence. 2021:886260520984259.

3. Adamou M, Fullen T, Galab N, Mackintosh I, Abbott K, Lowe D, et al. Psychological Effects of the COVID-19 Imposed Lockdown on Adults with Attention Deficit/Hyperactivity Disorder: Cross-Sectional Survey Study. JMIR Form Res. 2020;4(12):e24430.

4. Adıbelli D, Sümen A. The effect of the coronavirus (COVID-19) pandemic on health-related quality of life in children. Child Youth Serv Rev. 2020;119:105595.

5. Agostino DA, D'Angelo S, Giordano B, Cigognini AC, Chirico ML, Redaelli C, et al. Brief Psychotic Disorder During the National Lockdown in Italy: An Emerging Clinical Phenomenon of the COVID-19 Pandemic. Schizophr Bull. 2021;47(1):15-22.

6. Ahmed N, Maqsood A, Abduljabbar T, Vohra F. Tobacco Smoking a Potential Risk Factor in Transmission of COVID-19 Infection. Pak J Med Sci. 2020;36(COVID19-S4):S104-S7.

7. Ahmed S, Khaium MO, Tazmeem F. COVID-19 lockdown in India triggers a rapid rise in suicides due to the alcohol withdrawal symptoms: Evidence from media reports. Int J Soc Psychiatry. 2020;66(8):827-9.

8. Al Agha AE, Alharbi RS, Almohammadi OA, Yousef SY, Sulimani AE, Alaama RA. Impact of COVID-19 lockdown on glycemic control in children and adolescents. Saudi Med J. 2021;42(1):44-8.

9. Al Fagih A, Al Onazi M, Al Basiri S, Al-Kaf F, Dagriri K, Al Hebaishi Y, et al. Remotely monitored inactivity due to COVID-19 lockdowns. Potential hazard for heart failure patients. Saudi Med J. 2020;41(11):1211-6.

10. Al Omari O, Al Sabei S, Al Rawajfah O, Abu Sharour L, Aljohani K, Alomari K, et al. Prevalence and Predictors of Depression, Anxiety, and Stress among Youth at the Time of COVID-19: An Online Cross-Sectional Multicountry Study. Depress Res Treat. 2020;2020:8887727.

11. Al Zabadi H, Alhroub T, Yaseen N, Haj-Yahya M. Assessment of Depression Severity During Coronavirus Disease 2019 Pandemic Among the Palestinian Population: A Growing Concern and an Immediate Consideration. Front Psychiatry. 2020;11:570065.

12. Al-Ajlouni YA, Park SH, Alawa J, Shamaileh G, Bawab A, El-Sadr WM, et al. Anxiety and depressive symptoms are associated with poor sleep health during a period of COVID-19-induced nationwide lockdown: a cross-sectional analysis of adults in Jordan. BMJ Open. 2020;10(12):e041995.

13. Al-Musharaf S. Prevalence and Predictors of Emotional Eating among Healthy Young Saudi Women during the COVID-19 Pandemic. Nutrients. 2020;12(10).

14. Al-Qahtani AM, Elgzar WT, Ibrahim HA. COVID-19 Pandemic: Psycho-social Consequences During the Social Distancing Period Among Najran City Population. Psychiatr Danub. 2020;32(2):280-6.

15. Alambo A, Gaur M, Thirunarayan K. Depressive, drug abusive, or informative: Knowledge-aware study of news exposure during COVID-19 outbreak. arXiv preprint arXiv:200715209. 2020.

16. Alambo A, Padhee S, Banerjee T, Thirunarayan K. COVID-19 and Mental Health/Substance Use Disorders on Reddit: A Longitudinal Study. ArXiv. 2020.

17. Alfawaz HA, Wani K, Aljumah AA, Aldisi D, Ansari MGA, Yakout SM, et al. Psychological well-being during COVID-19 lockdown: Insights from a Saudi State University's Academic Community. J King Saud Univ Sci. 2021;33(1):101262.

18. Algahtani FD, Hassan SU, Alsaif B, Zrieq R. Assessment of the Quality of Life during COVID-19 Pandemic: A Cross-Sectional Survey from the Kingdom of Saudi Arabia. Int J Environ Res Public Health. 2021;18(3).

19. Alhusseini N, Alqahtani A. COVID-19 pandemic's impact on eating habits in Saudi Arabia. J Public Health Res. 2020;9(3):1868.

20. Alkhamees AA, Aljohani MS, Alghesen MA, Alhabib AT. Psychological Distress in Quarantine Designated Facility During COVID-19 Pandemic in Saudi Arabia. Risk Manag Healthc Policy. 2020;13:3103-20.

21. Alonso-Martínez AM, Ramírez-Vélez R, García-Alonso Y, Izquierdo M, García-Hermoso A. Physical Activity, Sedentary Behavior, Sleep and Self-Regulation in Spanish Preschoolers during the COVID-19 Lockdown. Int J Environ Res Public Health. 2021;18(2).

22. Alshehri FS, Alatawi Y, Alghamdi BS, Alhifany AA, Alharbi A. Prevalence of post-traumatic stress disorder during the COVID-19 pandemic in Saudi Arabia. Saudi Pharm J. 2020;28(12):1666-73.

23. Amatori S, Donati Zeppa S, Preti A, Gervasi M, Gobbi E, Ferrini F, et al. Dietary Habits and Psychological States during COVID-19 Home Isolation in Italian College Students: The Role of Physical Exercise. Nutrients. 2020;12(12).

24. Amendola S, Spensieri V, Hengartner MP, Cerutti R. Mental health of Italian adults during COVID-19 pandemic. Br J Health Psychol. 2021.

25. Ammar A, Brach M, Trabelsi K, Chtourou H, Boukhris O, Masmoudi L, et al. Effects of COVID-19 Home Confinement on Eating Behaviour and Physical Activity: Results of the ECLB-COVID19 International Online Survey. Nutrients. 2020;12(6).

26. Ammar A, Chtourou H, Boukhris O, Trabelsi K, Masmoudi L, Brach M, et al. COVID-19 Home Confinement Negatively Impacts Social Participation and Life Satisfaction: A Worldwide Multicenter Study. Int J Environ Res Public Health. 2020;17(17).

27. Amran MS. Psychosocial risk factors associated with mental health of adolescents amidst the COVID-19 pandemic outbreak. Int J Soc Psychiatry. 2020:20764020971008.

28. Ansah EW, Sarfo JO, Apaak D. Physical activity and dietary behaviors: a phenomenological analysis of experiences of Ghanaians during the COVID-19 lockdown. Pan Afr Med J. 2020;37(20):199.

29. Antunes R, Frontini R, Amaro N, Salvador R, Matos R, Morouco P, et al. Exploring Lifestyle Habits, Physical Activity, Anxiety and Basic Psychological Needs in a Sample of Portuguese Adults during COVID-19. Int J Environ Res Public Health. 2020;17(12).

30. Anyan F, Hjemdal O, Ernstsen L, Havnen A. Change in Physical Activity During the Coronavirus Disease 2019 Lockdown in Norway: The Buffering Effect of Resilience on Mental Health. Front Psychol. 2020;11:598481.

31. Ara T, Rahman MM, Hossain MA, Ahmed A. Identifying the Associated Risk Factors of Sleep Disturbance During the COVID-19 Lockdown in Bangladesh: A Web-Based Survey. Front Psychiatry. 2020;11:580268.

32. Ares G, Bove I, Vidal L, Brunet G, Fuletti D, Arroyo Á, et al. The experience of social distancing for families with children and adolescents during the coronavirus (COVID-19) pandemic in Uruguay: Difficulties and opportunities. Child Youth Serv Rev. 2021;121:105906.

33. Arima M, Takamiya Y, Furuta A, Siriratsivawong K, Tsuchiya S, Izumi M. Factors associated with the mental health status of medical students during the COVID-19 pandemic: a cross-sectional study in Japan. BMJ Open. 2020;10(12):e043728.

34. Asmundson GJG, Paluszek MM, Landry CA, Rachor GS, McKay D, Taylor S. Do pre-existing anxiety-related and mood disorders differentially impact COVID-19 stress responses and coping? J Anxiety Disord. 2020;74:102271.

35. Atesyakar N, Ecevitoglu A, Duman EA. Preliminary findings on the impact of COVID-19 pandemic on mood and daily routines of women from the BABIP birth cohort. Psychoneuroendocrinology. 2020;119.

36. Athanasiadis DI, Hernandez E, Hilgendorf W, Roper A, Embry M, Selzer D, et al. How are bariatric patients coping during the coronavirus disease 2019 (COVID-19) pandemic? Analysis of factors known to cause weight regain among postoperative bariatric patients. Surgery for Obesity and Related Diseases. 2020.

37. Aubertin-Leheudre M, Rolland Y. The Importance of Physical Activity to Care for Frail Older Adults During the COVID-19 Pandemic. J Am Med Dir Assoc. 2020;21(7):973-6.

38. Baenas I, Caravaca-Sanz E, Granero R, Sánchez I, Riesco N, Testa G, et al. COVID-19 and eating disorders during confinement: Analysis of factors associated with resilience and aggravation of symptoms. Eur Eat Disord Rev. 2020;28(6):855-63.

39. Balasubramanian A, Paleri V, Bennett R, Paleri V. Impact of COVID-19 on the mental health of surgeons and coping strategies. Head Neck. 2020;42(7):1638-44.

40. Balhara YPS, Kattula D, Singh S, Chukkali S, Bhargava R. Impact of lockdown following COVID-19 on the gaming behavior of college students. Indian J Public Health. 2020;64(Supplement):S172-S6.

41. Balhara YPS, Singh S, Narang P. Effect of lockdown following COVID-19 pandemic on alcohol use and help-seeking behavior: Observations and insights from a sample of alcohol use disorder patients under treatment from a tertiary care center. Psychiatry Clin Neurosci. 2020;74(8):440-1.

42. Ballivian J, Alcaide ML, Cecchini D, Jones DL, Abbamonte JM, Cassetti I. Impact of COVID-19-Related Stress and Lockdown on Mental Health Among People Living With HIV in Argentina. J Acquir Immune Defic Syndr. 2020;85(4):475-82.

43. Barbosa BT, Filho EMdS, Santos AdC, Brasileiro-Santos MdS. COVID-19 and social isolation: the consequences of not exercising for older adults health. Motriz: Revista de Educação Física. 2020;26.

44. Barguilla A, Fernández-Lebrero A, Estragués-Gázquez I, García-Escobar G, Navalpotro-Gómez I, Manero RM, et al. Effects of COVID-19 Pandemic Confinement in Patients With Cognitive Impairment. Front Neurol. 2020;11:589901.

45. Barker M, Russell J. Feeding the food insecure in Britain: learning from the 2020 COVID-19 crisis. Food Secur. 2020:1-6.

46. Bartoszek A, Walkowiak D, Bartoszek A, Kardas G. Mental Well-Being (Depression, Loneliness, Insomnia, Daily Life Fatigue) during COVID-19 Related Home-Confinement-A Study from Poland. Int J Environ Res Public Health. 2020;17(20).

47. Baschi R, Luca A, Nicoletti A, Caccamo M, Cicero CE, D'Agate C, et al. Changes in Motor, Cognitive, and Behavioral Symptoms in Parkinson's Disease and Mild Cognitive Impairment During the COVID-19 Lockdown. Front Psychiatry. 2020;11:590134.

48. Batool-Anwar S, Omobomi OS, Quan SF. Impact of the novel coronavirus disease on treatment adherence and sleep duration in patients with obstructive sleep apnea treated with positive airway pressure. J Clin Sleep Med. 2020;16(11):1917-20.

49. Beck F, Leger D, Cortaredona S, Verger P, Peretti-Watel P. Would we recover better sleep at the end of Covid-19? A relative improvement observed at the population level with the end of the lockdown in France. Sleep Med. 2021;78:115-9.

50. Beck F, Léger D, Fressard L, Peretti-Watel P, Verger P. Covid-19 health crisis and lockdown associated with high level of sleep complaints and hypnotic uptake at the population level. J Sleep Res. 2021;30(1):e13119.

51. Behere PB, Behere AP, Chowdhury D. Rise in Cases of Alcohol Withdrawal following Lockdown in Dry District of Wardha. J Neurosci Rural Pract. 2020;11(3):478-80.

52. Benke C, Autenrieth LK, Asselmann E, Pané-Farré CA. Lockdown, quarantine measures, and social distancing: Associations with depression, anxiety and distress at the beginning of the COVID-19 pandemic among adults from Germany. Psychiatry Res. 2020;293:113462.

53. Bentenuto A, Mazzoni N, Giannotti M, Venuti P, de Falco S. Psychological impact of Covid-19 pandemic in Italian families of children with neurodevelopmental disorders. Res Dev Disabil. 2021;109:103840.

54. Bentlage E, Ammar A, How D, Ahmed M, Trabelsi K, Chtourou H, et al. Practical Recommendations for Maintaining Active Lifestyle during the COVID-19 Pandemic: A Systematic Literature Review. Int J Environ Res Public Health. 2020;17(17).

55. Bergman D, Bethell C, Gombojav N, Hassink S, Stange KC. Physical Distancing With Social Connectedness. Ann Fam Med. 2020;18(3):272-7.

56. Bezerra ACV, Silva C, Soares FRG, Silva J. Factors associated with people's behavior in social isolation during the COVID-19 pandemic. Cien Saude Colet. 2020;25(suppl 1):2411-21.

57. Biagioli V, Albanesi B, Belloni S, Piredda A, Caruso R. Living with cancer in the COVID-19 pandemic: An Italian survey on self-isolation at home. Eur J Cancer Care (Engl). 2020:e13385.

58. Bigalke JA, Greenlund IM, Carter JR. Sex differences in self-report anxiety and sleep quality during COVID-19 stay-at-home orders. Biol Sex Differ. 2020;11(1):56.

59. Bin Zarah A, Enriquez-Marulanda J, Andrade JM. Relationship between Dietary Habits, Food Attitudes and Food Security Status among Adults Living within the United States Three Months Post-Mandated Quarantine: A Cross-Sectional Study. Nutrients. 2020;12(11).

60. Birditt KS, Turkelson A, Fingerman KL, Polenick CA, Oya A. Age Differences in Stress, Life Changes, and Social Ties During the COVID-19 Pandemic: Implications for Psychological Well-Being. Gerontologist. 2021;61(2):205-16.

61. Bivia-Roig G, La Rosa VL, Gomez-Tebar M, Serrano-Raya L, Amer-Cuenca JJ, Caruso S, et al. Analysis of the Impact of the Confinement Resulting from COVID-19 on the Lifestyle and Psychological Wellbeing of Spanish Pregnant Women: An Internet-Based Cross-Sectional Survey. Int J Environ Res Public Health. 2020;17(16).

62. Bobo E, Lin L, Acquaviva E, Caci H, Franc N, Gamon L, et al. [How do children and adolescents with Attention Deficit Hyperactivity Disorder (ADHD) experience lockdown during the COVID-19 outbreak?]. Encephale. 2020;46(3S):S85-S92.

63. Bollen Z, Pabst A, Creupelandt C, Fontesse S, Lannoy S, Pinon N, et al. Prior drinking motives predict alcohol consumption during the COVID-19 lockdown: A cross-sectional online survey among Belgian college students. Addict Behav. 2021;115:106772.

64. Bommele J, Hopman P, Walters BH, Geboers C, Croes E, Fong GT, et al. The double-edged relationship between COVID-19 stress and smoking: Implications for smoking cessation. Tob Induc Dis. 2020;18:63.

65. Bonati M, Campi R, Zanetti M, Cartabia M, Scarpellini F, Clavenna A, et al. Psychological distress among Italians during the 2019 coronavirus disease (COVID-19) quarantine. BMC Psychiatry. 2021;21(1):20.

66. Bonny-Noach H, Gold D. Addictive behaviors and craving during the COVID-19 pandemic of people who have recovered from substance use disorder. Journal of addictive diseases. 2020:1-20.

67. Boschuetz N, Cheng S, Mei L, Loy VM. Changes in Alcohol Use Patterns in the United States During COVID-19 Pandemic. WMJ. 2020;119(3):171-6.

68. Botes WM, Thaldar DW. COVID-19 and quarantine orders: A practical approach. S Afr Med J. 2020;110(6):469-72.

69. Bourdas DI, Zacharakis ED. Evolution of changes in physical activity over lockdown time: Physical activity datasets of four independent adult sample groups corresponding to each of the last four of the six COVID-19 lockdown weeks in Greece. Data Brief. 2020;32:106301.

70. Boursier V, Gioia F, Musetti A, Schimmenti A. Facing Loneliness and Anxiety During the COVID-19 Isolation: The Role of Excessive Social Media Use in a Sample of Italian Adults. Front Psychiatry. 2020;11:586222.

71. Bowen J, Garcia E, Darder P, Arguelles J, Fatjo J. The effects of the Spanish COVID-19 lockdown on people, their pets, and the human-animal bond. J Vet Behav. 2020;40:75-91.

72. Boyraz G, Legros DN, Tigershtrom A. COVID-19 and traumatic stress: The role of perceived vulnerability, COVID-19-related worries, and social isolation. J Anxiety Disord. 2020;76:102307.

73. Brady SM, Fenton SAM, Metsios GS, Bosworth A, Duda JL, Kitas GD, et al. Different types of physical activity are positively associated with indicators of mental health and psychological wellbeing in rheumatoid arthritis during COVID-19. Rheumatol Int. 2021;41(2):335-44.

74. Branley-Bell D, Talbot CV. Exploring the impact of the COVID-19 pandemic and UK lockdown on individuals with experience of eating disorders. J Eat Disord. 2020;8:44.

75. Brenner MH, Bhugra D. Acceleration of Anxiety, Depression, and Suicide: Secondary Effects of Economic Disruption Related to COVID-19. Front Psychiatry. 2020;11:592467.

76. Brown L, Mossabir R, Harrison N, Brundle C, Smith J, Clegg A. Life in lockdown: A telephone survey to investigate the impact of COVID-19 lockdown measures on the lives of older people (≥ 75 years). Age Ageing. 2020.

77. Brown S, Schuman DL. Suicide in the Time of COVID-19: A Perfect Storm. J Rural Health. 2021;37(1):211-4.

78. Burhamah W, AlKhayyat A, Oroszlányová M, AlKenane A, Almansouri A, Behbehani M, et al. The psychological burden of the COVID-19 pandemic and associated lockdown measures: Experience from 4000 participants. J Affect Disord. 2020;277:977-85.

79. Burke T, Berry A, Taylor LK, Stafford O, Murphy E, Shevlin M, et al. Increased Psychological Distress during COVID-19 and Quarantine in Ireland: A National Survey. J Clin Med. 2020;9(11).

80. Burtscher J, Burtscher M, Millet GP. (Indoor) isolation, stress, and physical inactivity: Vicious circles accelerated by COVID-19? Scand J Med Sci Sports. 2020;30(8):1544-5.

81. Buzzi C, Tucci M, Ciprandi R, Brambilla I, Caimmi S, Ciprandi G, et al. The psycho-social effects of COVID-19 on Italian adolescents' attitudes and behaviors. Ital J Pediatr. 2020;46(1):69.

82. Caballero-Dominguez CC, Jimenez-Villamizar MP, Campo-Arias A. Suicide risk during the lockdown due to coronavirus disease (COVID-19) in Colombia. Death Stud. 2020:1-6.

83. Cachón-Zagalaz J, Zagalaz-Sánchez Mª L, Arufe-Giráldez V, Sanmiguel-Rodríguez A, González-Valero G. Physical Activity and Daily Routine among Children Aged 0-12 during the COVID-19 Pandemic in Spain. Int J Environ Res Public Health. 2021;18(2).

84. Caffo E, Scandroglio F, Asta L. Debate: COVID-19 and psychological well-being of children and adolescents in Italy. Child Adolesc Ment Health. 2020;25(3):167-8.

85. Cagnin A, Di Lorenzo R, Marra C, Bonanni L, Cupidi C, Laganà V, et al. Behavioral and Psychological Effects of Coronavirus Disease-19 Quarantine in Patients With Dementia. Front Psychiatry. 2020;11:578015.

86. Cai X, Hu X, Ekumi IO, Wang J, An Y, Li Z, et al. Psychological Distress and Its Correlates Among COVID-19 Survivors During Early Convalescence Across Age Groups. Am J Geriatr Psychiatry. 2020;28(10):1030-9.

87. Callow DD, Arnold-Nedimala NA, Jordan LS, Pena GS, Won J, Woodard JL, et al. The Mental Health Benefits of Physical Activity in Older Adults Survive the COVID-19 Pandemic. Am J Geriatr Psychiatry. 2020;28(10):1046-57.

88. Campbell AD. Practical Implications of Physical Distancing, Social Isolation, and Reduced Physicality for Older Adults in Response to COVID-19. J Gerontol Soc Work. 2020;63(6-7):668-70.

89. Cancello R, Soranna D, Zambra G, Zambon A, Invitti C. Determinants of the Lifestyle Changes during COVID-19 Pandemic in the Residents of Northern Italy. Int J Environ Res Public Health. 2020;17(17).

90. Carel H, Ratcliffe M, Froese T. Reflecting on experiences of social distancing. Lancet. 2020;396(10244):87-8.

91. Carlos AF, Poloni TE, Caridi M, Pozzolini M, Vaccaro R, Rolandi E, et al. Life during COVID-19 lockdown in Italy: the influence of cognitive state on psychosocial, behavioral and lifestyle profiles of older adults. Aging Ment Health. 2021:1-10.

92. Carmina S, Sajan A, Raksha S, Roja K, Jasmin J, Calvin G, et al. Changes and Compromises in Health Choices during COVID-19 Lockdown in Kathmandu Valley: A Descriptive Cross-sectional Study. Journal of Nepal Medical Association. 2020;58(232).

93. Carr D, Boerner K, Moorman S. Bereavement in the Time of Coronavirus: Unprecedented Challenges Demand Novel Interventions. J Aging Soc Policy. 2020;32(4-5):425-31.

94. Carriedo A, Cecchini JA, Fernandez-Rio J, Mendez-Gimenez A. COVID-19, Psychological Well-being and Physical Activity Levels in Older Adults During the Nationwide Lockdown in Spain. Am J Geriatr Psychiatry. 2020;28(11):1146-55.

95. Carriedo A, Cecchini JA, Fernández-Río J, Méndez-Giménez A. Resilience and physical activity in people under home isolation due to COVID-19: A preliminary evaluation. Ment Health Phys Act. 2020;19:100361.

96. Carvalho PMM, Moreira MM, de Oliveira MNA, Landim JMM, Neto MLR. The psychiatric impact of the novel coronavirus outbreak. Psychiatry Res. 2020;286:112902.

97. Casagrande M, Favieri F, Tambelli R, Forte G. The enemy who sealed the world: Effects quarantine due to the COVID-19 on sleep quality, anxiety, and psychological distress in the Italian population. Sleep medicine. 2020;75:12-20.

98. Castellini G, Cassioli E, Rossi E, Innocenti M, Gironi V, Sanfilippo G, et al. The impact of COVID-19 epidemic on eating disorders: A longitudinal observation of pre versus post psychopathological features in a sample of patients with eating disorders and a group of healthy controls. Int J Eat Disord. 2020;53(11):1855-62.

99. Castro-de-Araujo LFS, Machado DB. Impact of COVID-19 on mental health in a Low and Middle-Income Country. Cien Saude Colet. 2020;25(suppl 1):2457-60.

100. Cecchetto C, Aiello M, Gentili C, Ionta S, Osimo SA. Increased emotional eating during COVID-19 associated with lockdown, psychological and social distress. Appetite. 2021;160:105122.

101. Cecchini JA, Carriedo A, Fernández-Río J, Méndez-Giménez A, González C, Sánchez-Martínez B, et al. A longitudinal study on depressive symptoms and physical activity during the Spanish lockdown. Int J Clin Health Psychol. 2021;21(1):100200.

102. Cellini N, Canale N, Mioni G, Costa S. Changes in sleep pattern, sense of time and digital media use during COVID-19 lockdown in Italy. J Sleep Res. 2020;29(4):e13074.

103. Cellini N, Conte F, De Rosa O, Giganti F, Malloggi S, Reyt M, et al. Changes in sleep timing and subjective sleep quality during the COVID-19 lockdown in Italy and Belgium: age, gender and working status as modulating factors. Sleep Med. 2021;77:112-9.

104. Cerami C, Santi GC, Galandra C, Dodich A, Cappa SF, Vecchi T, et al. Covid-19 Outbreak In Italy: Are We Ready for the Psychosocial and the Economic Crisis? Baseline Findings From the PsyCovid Study. Front Psychiatry. 2020;11:556.

105. Chagué F, Boulin M, Eicher J, Bichat F, Saint-Jalmes M, Cransac A, et al. Alarming increased rate of smoking and associated lifestyle behaviours in patients with chronic cardiac diseases during COVID-19 pandemic related lockdown. Archives of Cardiovascular Diseases Supplements. 2021;13(1):127-.

106. Chagué F, Boulin M, Eicher JC, Bichat F, Saint Jalmes M, Cransac-Miet A, et al. Impact of lockdown on patients with congestive heart failure during the coronavirus disease 2019 pandemic. ESC Heart Fail. 2020;7(6):4420-3.

107. Chakraborty K, Chatterjee M. Psychological impact of COVID-19 pandemic on general population in West Bengal: A cross-sectional study. Indian J Psychiatry. 2020;62(3):266-72.

108. Chandola T, Kumari M, Booker CL, Benzeval M. The mental health impact of COVID-19 and lockdown-related stressors among adults in the UK. Psychol Med. 2020:1-10.

109. Chandrasekaran B, Ganesan TB. Sedentarism and chronic disease risk in COVID 19 lockdown - a scoping review. Scott Med J. 2021;66(1):3-10.

110. Chatterjee SS, Barikar CM, Mukherjee A. Impact of COVID-19 pandemic on pre-existing mental health problems. Asian J Psychiatr. 2020;51:102071.

111. Chaturvedi K, Vishwakarma DK, Singh N. COVID-19 and its impact on education, social life and mental health of students: A survey. Child Youth Serv Rev. 2021;121:105866.

112. Cheikh Ismail L, Osaili TM, Mohamad MN, Al Marzouqi A, Jarrar AH, Abu Jamous DO, et al. Eating Habits and Lifestyle during COVID-19 Lockdown in the United Arab Emirates: A Cross-Sectional Study. Nutrients. 2020;12(11).

113. Cheikh Ismail L, Osaili TM, Mohamad MN, Al Marzouqi A, Jarrar AH, Zampelas A, et al. Assessment of eating habits and lifestyle during the coronavirus 2019 pandemic in the Middle East and North Africa region: a cross-sectional study. Br J Nutr. 2020:1-10.

114. Chen B, Sun J, Feng Y. How Have COVID-19 Isolation Policies Affected Young People's Mental Health? - Evidence From Chinese College Students. Front Psychol. 2020;11:1529.

115. Cheval B, Sivaramakrishnan H, Maltagliati S, Fessler L, Forestier C, Sarrazin P, et al. Relationships between changes in self-reported physical activity, sedentary behaviour and health during the coronavirus (COVID-19) pandemic in France and Switzerland. J Sports Sci. 2020:1-6.

116. Chodkiewicz J, Talarowska M, Miniszewska J, Nawrocka N, Bilinski P. Alcohol Consumption Reported during the COVID-19 Pandemic: The Initial Stage. Int J Environ Res Public Health. 2020;17(13).

117. Chopra S, Ranjan P, Singh V, Kumar S, Arora M, Hasan MS, et al. Impact of COVID-19 on lifestyle-related behaviours- a cross-sectional audit of responses from nine hundred and ninety-five participants from India. Diabetes Metab Syndr. 2020;14(6):2021-30.

118. Cicero AFG, Fogacci F, Giovannini M, Mezzadri M, Grandi E, Borghi C, et al. COVID-19-Related Quarantine Effect on Dietary Habits in a Northern Italian Rural Population: Data from the Brisighella Heart Study. Nutrients. 2021;13(2).

119. Clair R, Gordon M, Kroon M, Reilly C. The effects of social isolation on well-being and life satisfaction during pandemic. Humanities and Social Sciences Communications. 2021;8(1):28.

120. Collivignarelli MC, De Rose C, Abbà A, Baldi M, Bertanza G, Pedrazzani R, et al. Analysis of lockdown for CoViD-19 impact on NO(2) in London, Milan and Paris: What lesson can be learnt? Process Saf Environ Prot. 2021;146:952-60.

121. Columb D, Hussain R, O'Gara C. Addiction psychiatry and COVID-19: impact on patients and service provision. Ir J Psychol Med. 2020;37(3):164-8.

122. Conejero I, Berrouiguet S, Ducasse D, Leboyer M, Jardon V, Olie E, et al. [Suicidal behavior in light of COVID-19 outbreak: Clinical challenges and treatment perspectives]. Encephale. 2020;46(3S):S66-S72.

123. Constandt B, Thibaut E, De Bosscher V, Scheerder J, Ricour M, Willem A. Exercising in Times of Lockdown: An Analysis of the Impact of COVID-19 on Levels and Patterns of Exercise among Adults in Belgium. Int J Environ Res Public Health. 2020;17(11).

124. Cooper JA, vanDellen M, Bhutani S. Self-weighing Practices and Associated Health Behaviors during COVID-19. Am J Health Behav. 2021;45(1):17-30.

125. Cooper M, Reilly EE, Siegel JA, Coniglio K, Sadeh-Sharvit S, Pisetsky EM, et al. Eating disorders during the COVID-19 pandemic and quarantine: an overview of risks and recommendations for treatment and early intervention. Eat Disord. 2020:1-23.

126. Costabile T, Carotenuto A, Lavorgna L, Borriello G, Moiola L, Inglese M, et al. COVID-19 pandemic and mental distress in multiple sclerosis: implications for clinical management. Eur J Neurol. 2020.

127. Costi S, Paltrinieri S, Bressi B, Fugazzaro S, Giorgi Rossi P, Mazzini E. Poor Sleep during the First Peak of the SARS-CoV-2 Pandemic: A Cross-Sectional Study. Int J Environ Res Public Health. 2021;18(1).

128. Cousijn J, Kuhns L, Larsen H, Kroon E. For better or for worse? A pre-post exploration of the impact of the COVID-19 lockdown on cannabis users. Addiction. 2021.

129. Cransac-Miet A, Zeller M, Chague F, Faure AS, Bichat F, Danchin N, et al. Impact of COVID-19 lockdown on lifestyle adherence in stay-at-home patients with chronic coronary syndromes: Towards a time bomb. Int J Cardiol. 2021;323:285-7.

130. Crochemore-Silva I, Knuth AG, Wendt A, Nunes BP, Hallal PC, Santos LP, et al. Physical activity during the COVID-19 pandemic: a population-based cross-sectional study in a city of South Brazil. Cien Saude Colet. 2020;25(11):4249-58.

131. Croizier C, Bouillon-Minois JB, Bay JO, Dutheil F. COVID-19 lockdown and mental health: why we must look into oncology units. Psychol Med. 2020:1-2.

132. Damiot A, Pinto AJ, Turner JE, Gualano B. Immunological Implications of Physical Inactivity among Older Adults during the COVID-19 Pandemic. Gerontology. 2020;66(5):431-8.

133. Dawson DL, Golijani-Moghaddam N. COVID-19: Psychological flexibility, coping, mental health, and wellbeing in the UK during the pandemic. J Contextual Behav Sci. 2020;17:126-34.

134. de Girolamo G, Cerveri G, Clerici M, Monzani E, Spinogatti F, Starace F, et al. Mental Health in the Coronavirus Disease 2019 Emergency-The Italian Response. JAMA Psychiatry. 2020;77(9):974-6.

135. Degraeve A, Lejeune S, Muilwijk T, Poelaert F, Piraprez M, Svistakov I, et al. When residents work less, they feel better: Lessons learned from an unprecedent context of lockdown. Prog Urol. 2020;30(16):1060-6.

136. DeJong CAJ, DeJong Verhagen JG, Pols R, Verbrugge CAG, Baldacchino A. Psychological Impact of the Acute COVID-19 Period on Patients With Substance Use Disorders: We are all in this Together. Basic Clin Neurosci. 2020;11(2):207-16.

137. Dellagiulia A, Lionetti F, Fasolo M, Verderame C, Sperati A, Alessandri G. Early impact of COVID-19 lockdown on children's sleep: a 4-week longitudinal study. J Clin Sleep Med. 2020;16(9):1639-40.

138. Delussi M, Gentile E, Coppola G, Prudenzano AMP, Rainero I, Sances G, et al. Investigating the Effects of COVID-19 Quarantine in Migraine: An Observational Cross-Sectional Study From the Italian National Headache Registry (RICe). Front Neurol. 2020;11:597881.

139. Deslandes SF, Coutinho T. The intensive use of the internet by children and adolescents in the context of COVID-19 and the risks for self-inflicted violence. Cien Saude Colet. 2020;25(suppl 1):2479-86.

140. Di Corrado D, Magnano P, Muzii B, Coco M, Guarnera M, De Lucia S, et al. Effects of social distancing on psychological state and physical activity routines during the COVID-19 pandemic. Sport Sci Health. 2020:1-6.

141. Di Giuseppe M, Zilcha-Mano S, Prout TA, Perry JC, Orrù G, Conversano C. Psychological Impact of Coronavirus Disease 2019 Among Italians During the First Week of Lockdown. Front Psychiatry. 2020;11:576597.

142. Di Renzo L, Gualtieri P, Cinelli G, Bigioni G, Soldati L, Attina A, et al. Psychological Aspects and Eating Habits during COVID-19 Home Confinement: Results of EHLC-COVID-19 Italian Online Survey. Nutrients. 2020;12(7).

143. Di Renzo L, Gualtieri P, Pivari F, Soldati L, Attina A, Cinelli G, et al. Eating habits and lifestyle changes during COVID-19 lockdown: an Italian survey. J Transl Med. 2020;18(1):229.

144. Di Santo SG, Franchini F, Filiputti B, Martone A, Sannino S. The Effects of COVID-19 and Quarantine Measures on the Lifestyles and Mental Health of People Over 60 at Increased Risk of Dementia. Front Psychiatry. 2020;11:578628.

145. Di Stefano V, Battaglia G, Giustino V, Gagliardo A, D'Aleo M, Giannini O, et al. Significant reduction of physical activity in patients with neuromuscular disease during COVID-19 pandemic: the long-term consequences of quarantine. J Neurol. 2021;268(1):20-6.

146. Diamond R, Byrd E. Standing up for health - improving mental wellbeing during COVID-19 isolation by reducing sedentary behaviour. J Affect Disord. 2020;277:232-4.

147. Ding D, Del Pozo Cruz B, Green MA, Bauman AE. Is the COVID-19 lockdown nudging people to be more active: a big data analysis. Br J Sports Med. 2020;54(20):1183-4.

148. Diniz TA, Christofaro DGD, Tebar WR, Cucato GG, Botero JP, Correia MA, et al. Reduction of Physical Activity Levels During the COVID-19 Pandemic Might Negatively Disturb Sleep Pattern. Front Psychol. 2020;11:586157.

149. Dobler CL, Krüger B, Strahler J, Weyh C, Gebhardt K, Tello K, et al. Physical Activity and Mental Health of Patients with Pulmonary Hypertension during the COVID-19 Pandemic. J Clin Med. 2020;9(12).

150. Dogas Z, Lusic Kalcina L, Pavlinac Dodig I, Demirovic S, Madirazza K, Valic M, et al. The effect of COVID-19 lockdown on lifestyle and mood in Croatian general population: a cross-sectional study. Croat Med J. 2020;61(4):309-18.

151. Dohet F, Loap S, Menzel A, Iddir M, Dadoun F, Bohn T, et al. Obesity considerations during the COVID-19 outbreak. Int J Vitam Nutr Res. 2021:1-13.

152. Doogan C, Buntine W, Linger H, Brunt S. Public Perceptions and Attitudes Toward COVID-19 Nonpharmaceutical Interventions Across Six Countries: A Topic Modeling Analysis of Twitter Data. J Med Internet Res. 2020;22(9):e21419.

153. Dorman-Ilan S, Hertz-Palmor N, Brand-Gothelf A, Hasson-Ohayon I, Matalon N, Gross R, et al. Anxiety and Depression Symptoms in COVID-19 Isolated Patients and in Their Relatives. Front Psychiatry. 2020;11:581598.

154. Droit-Volet S, Gil S, Martinelli N, Andant N, Clinchamps M, Parreira L, et al. Time and Covid-19 stress in the lockdown situation: Time free, <<Dying>> of boredom and sadness. PLoS One. 2020;15(8):e0236465.

155. Dsouza DD, Quadros S, Hyderabadwala ZJ, Mamun MA. Aggregated COVID-19 suicide incidences in India: Fear of COVID-19 infection is the prominent causative factor. Psychiatry Res. 2020;290:113145.

156. Duan H, Yan L, Ding X, Gan Y, Kohn N, Wu J. Impact of the COVID-19 pandemic on mental health in the general Chinese population: Changes, predictors and psychosocial correlates. Psychiatry Res. 2020;293:113396.

157. Dubey S, Biswas P, Ghosh R, Chatterjee S, Dubey MJ, Chatterjee S, et al. Psychosocial impact of COVID-19. Diabetes Metab Syndr. 2020;14(5):779-88.

158. Duncan GE, Avery AR, Seto E, Tsang S. Perceived change in physical activity levels and mental health during COVID-19: Findings among adult twin pairs. PLoS One. 2020;15(8):e0237695.

159. Egbe CO, Ngobese SP. COVID-19 lockdown and the tobacco product ban in South Africa. Tob Induc Dis. 2020;18:39.

160. Eghtesadi M. Breaking Social Isolation Amidst COVID-19: A Viewpoint on Improving Access to Technology in Long-Term Care Facilities. J Am Geriatr Soc. 2020;68(5):949-50.

161. Elmer T, Mepham K, Stadtfeld C. Students under lockdown: Comparisons of students' social networks and mental health before and during the COVID-19 crisis in Switzerland. PLoS One. 2020;15(7):e0236337.

162. Ernstsen L, Havnen A. Mental health and sleep disturbances in physically active adults during the COVID-19 lockdown in Norway: does change in physical activity level matter? Sleep Med. 2021;77:309-12.

163. Every-Palmer S, Jenkins M, Gendall P, Hoek J, Beaglehole B, Bell C, et al. Psychological distress, anxiety, family violence, suicidality, and wellbeing in New Zealand during the COVID-19 lockdown: A cross-sectional study. PLoS One. 2020;15(11):e0241658.

164. Ezpeleta L, Navarro JB, de la Osa N, Trepat E, Penelo E. Life Conditions during COVID-19 Lockdown and Mental Health in Spanish Adolescents. Int J Environ Res Public Health. 2020;17(19).

165. Fallon K. Exercise in the time of COVID-19. Aust J Gen Pract. 2020;49.

166. Fan PEM, Aloweni F, Lim SH, Ang SY, Perera K, Quek AH, et al. Needs and concerns of patients in isolation care units - learnings from COVID-19: A reflection. World J Clin Cases. 2020;8(10):1763-6.

167. Fares-Otero NE, Pfaltz MC, Estrada-Lorenzo JM, Rodriguez-Jimenez R. COVID-19: The need for screening for domestic violence and related neurocognitive problems. J Psychiatr Res. 2020;130:433-4.

168. Fawaz M, Samaha A. COVID-19 quarantine: Post-traumatic stress symptomatology among Lebanese citizens. Int J Soc Psychiatry. 2020;66(7):666-74.

169. Fernandez-Del-Valle M, Donadio MVF, Perez-Ruiz M. Physical exercise as a tool to minimize the consequences of the Covid-19 quarantine: An overview for cystic fibrosis. Pediatr Pulmonol. 2020;55(11):2877-82.

170. Ferrante G, Camussi E, Piccinelli C, Senore C, Armaroli P, Ortale A, et al. [Did social isolation during the SARS-CoV-2 epidemic have an impact on the lifestyles of citizens?]. Epidemiol Prev. 2020;44(5-6 Suppl 2):353-62.

171. Findlay LC, Arim R, Kohen D. Understanding the Perceived Mental Health of Canadians During the COVID-19 Pandemic. Health Rep. 2020;31(4):22-7.

172. Finlay I, Gilmore I. Covid-19 and alcohol-a dangerous cocktail. BMJ. 2020;369:m1987.

173. Fiorenzato E, Zabberoni S, Costa A, Cona G. Cognitive and mental health changes and their vulnerability factors related to COVID-19 lockdown in Italy. PLoS One. 2021;16(1):e0246204.

174. Fiorillo A, Sampogna G, Giallonardo V, Del Vecchio V, Luciano M, Albert U, et al. Effects of the lockdown on the mental health of the general population during the COVID-19 pandemic in Italy: Results from the COMET collaborative network. Eur Psychiatry. 2020;63(1):e87.

175. Fisher L, Polonsky W, Asuni A, Jolly Y, Hessler D. The early impact of the COVID-19 pandemic on adults with type 1 or type 2 diabetes: A national cohort study. J Diabetes Complications. 2020;34(12):107748.

176. Fofana NK, Latif F, Sarfraz S, Bilal, Bashir MF, Komal B. Fear and agony of the pandemic leading to stress and mental illness: An emerging crisis in the novel coronavirus (COVID-19) outbreak. Psychiatry Res. 2020;291:113230.

177. Franceschini C, Musetti A, Zenesini C, Palagini L, Scarpelli S, Quattropani MC, et al. Poor Sleep Quality and Its Consequences on Mental Health During the COVID-19 Lockdown in Italy. Front Psychol. 2020;11:574475.

178. Francisco R, Pedro M, Delvecchio E, Espada JP, Morales A, Mazzeschi C, et al. Psychological Symptoms and Behavioral Changes in Children and Adolescents During the Early Phase of COVID-19 Quarantine in Three European Countries. Front Psychiatry. 2020;11:570164.

179. Fu W, Yan S, Zong Q, Anderson-Luxford D, Song X, Lv Z, et al. Mental health of college students during the COVID-19 epidemic in China. J Affect Disord. 2021;280(Pt A):7-10.

180. Fullana MA, Hidalgo-Mazzei D, Vieta E, Radua J. Coping behaviors associated with decreased anxiety and depressive symptoms during the COVID-19 pandemic and lockdown. J Affect Disord. 2020;275:80-1.

181. Furlong Y, Finnie T. Culture counts: the diverse effects of culture and society on mental health amidst COVID-19 outbreak in Australia. Ir J Psychol Med. 2020;37(3):237-42.

182. Fuse-Nagase Y, Kuroda T, Watanabe J. Mental health of university freshmen in Japan during the COVID-19 pandemic: Screening with Kessler psychological distress scale (K6). Asian J Psychiatr. 2020;54:102407.

183. Fuzeki E, Groneberg DA, Banzer W. Physical activity during COVID-19 induced lockdown: recommendations. J Occup Med Toxicol. 2020;15:25.

184. Gadermann AC, Thomson KC, Richardson CG, Gagné M, McAuliffe C, Hirani S, et al. Examining the impacts of the COVID-19 pandemic on family mental health in Canada: findings from a national cross-sectional study. BMJ Open. 2021;11(1):e042871.

185. Galassi A, Augustinho Teixeira TO, Lopes De Domenico EB, Al-Ruzzieh M, Oyoe Ohene Oti N, Sukumaran S. COVID-19 Pandemic: Preparing to Care for Patients With Cancer From the Perspective of Low- and Middle-Income Countries. Clin J Oncol Nurs. 2020;24(5):586-90.

186. Gallagher S, Bennett KM, Roper L. Loneliness and depression in patients with cancer during COVID-19. J Psychosoc Oncol. 2020:1-7.

187. Gallagher S, Wetherell MA. Risk of depression in family caregivers: unintended consequence of COVID-19. BJPsych Open. 2020;6(6):e119.

188. Galle F, Sabella EA, Ferracuti S, De Giglio O, Caggiano G, Protano C, et al. Sedentary Behaviors and Physical Activity of Italian Undergraduate Students during Lockdown at the Time of CoViD-19 Pandemic. Int J Environ Res Public Health. 2020;17(17).

189. Gallo LA, Gallo TF, Young SL, Moritz KM, Akison LK. The Impact of Isolation Measures Due to COVID-19 on Energy Intake and Physical Activity Levels in Australian University Students. Nutrients. 2020;12(6).

190. Gambin M, Sękowski M, Woźniak-Prus M, Wnuk A, Oleksy T, Cudo A, et al. Generalized anxiety and depressive symptoms in various age groups during the COVID-19 lockdown in Poland. Specific predictors and differences in symptoms severity. Compr Psychiatry. 2021;105:152222.

191. Gan Y, Ma J, Wu J, Chen Y, Zhu H, Hall BJ. Immediate and delayed psychological effects of province-wide lockdown and personal quarantine during the COVID-19 outbreak in China. Psychol Med. 2020:1-12.

192. Gao C, Scullin MK. Sleep health early in the coronavirus disease 2019 (COVID-19) outbreak in the United States: integrating longitudinal, cross-sectional, and retrospective recall data. Sleep Med. 2020;73:1-10.

193. Garcia JM, Lawrence S, Brazendale K, Leahy N, Fukuda D. Brief report: The impact of the COVID-19 pandemic on health behaviors in adolescents with Autism Spectrum Disorder. Disabil Health J. 2020:101021.

194. Garcia-Alvarez L, Fuente-Tomas L, Saiz PA, Garcia-Portilla MP, Bobes J. Will changes in alcohol and tobacco use be seen during the COVID-19 lockdown? Adicciones. 2020;32(2):85-9.

195. Garnett C, Jackson S, Oldham M, Brown J, Steptoe A, Fancourt D. Factors associated with drinking behaviour during COVID-19 social distancing and lockdown among adults in the UK. Drug Alcohol Depend. 2021;219:108461.

196. Garre-Olmo J, Turró-Garriga O, Martí-Lluch R, Zacarías-Pons L, Alves-Cabratosa L, Serrano-Sarbosa D, et al. Changes in lifestyle resulting from confinement due to COVID-19 and depressive symptomatology: A cross-sectional a population-based study. Compr Psychiatry. 2021;104:152214.

197. Gautam V, S D, Rustagi N, Mittal A, Patel M, Shafi S, et al. Health literacy, preventive COVID 19 behaviour and adherence to chronic disease treatment during lockdown among patients registered at primary health facility in urban Jodhpur, Rajasthan. Diabetes Metab Syndr. 2020;15(1):205-11.

198. Gendall P, Hoek J, Stanley J, Jenkins M, Every-Palmer S. Changes in Tobacco Use During the 2020 COVID-19 Lockdown in New Zealand. Nicotine Tob Res. 2021.

199. Ghesquière L, Garabedian C, Drumez E, Lemaître M, Cazaubiel M, Bengler C, et al. Effects of COVID-19 pandemic lockdown on gestational diabetes mellitus: A retrospective study. Diabetes Metab. 2020:101201.

200. Ghimire A. COVID-19 Lockdown effect: surge of alcohol withdrawal cases in emergency department. Journal of Patan Academy of Health Sciences. 2020;7(1):91-2.

201. Ghosal S, Sinha B, Majumder M, Misra A. Estimation of effects of nationwide lockdown for containing coronavirus infection on worsening of glycosylated haemoglobin and increase in diabetes-related complications: A simulation model using multivariate regression analysis. Diabetes Metab Syndr. 2020;14(4):319-23.

202. Ghosh A, Arora B, Gupta R, Anoop S, Misra A. Effects of nationwide lockdown during COVID-19 epidemic on lifestyle and other medical issues of patients with type 2 diabetes in north India. Diabetes Metab Syndr. 2020;14(5):917-20.

203. Ghosh A, Choudhury S, Singh SM, Basu A. SARS-CoV-2 and Extended Lockdown: A New Lesson for India's Alcohol Policy? J Stud Alcohol Drugs. 2020;81(4):520-1.

204. Ghosh R, Dubey MJ, Chatterjee S, Dubey S. Impact of COVID -19 on children: special focus on the psychosocial aspect. Minerva Pediatr. 2020;72(3):226-35.

205. Giacalone D, Frøst MB, Rodríguez-Pérez C. Reported Changes in Dietary Habits During the COVID-19 Lockdown in the Danish Population: The Danish COVIDiet Study. Front Nutr. 2020;7:592112.

206. Gilic B, Ostojic L, Corluka M, Volaric T, Sekulic D. Contextualizing Parental/Familial Influence on Physical Activity in Adolescents before and during COVID-19 Pandemic: A Prospective Analysis. Children (Basel). 2020;7(9).

207. Giordano A, Siciliano M, De Micco R, Sant'Elia V, Russo A, Tedeschi G, et al. Correlates of psychological distress in epileptic patients during the COVID-19 outbreak. Epilepsy Behav. 2021;115:107632.

208. Gismero-González E, Bermejo-Toro L, Cagigal V, Roldán A, Martínez-Beltrán MJ, Halty L. Emotional Impact of COVID-19 Lockdown Among the Spanish Population. Front Psychol. 2020;11:616978.

209. Gloster AT, Lamnisos D, Lubenko J, Presti G, Squatrito V, Constantinou M, et al. Impact of COVID-19 pandemic on mental health: An international study. PLoS One. 2020;15(12):e0244809.

210. Glowacz F, Schmits E. Psychological distress during the COVID-19 lockdown: The young adults most at risk. Psychiatry Res. 2020;293:113486.

211. Goethals L, Barth N, Guyot J, Hupin D, Celarier T, Bongue B. Impact of Home Quarantine on Physical Activity Among Older Adults Living at Home During the COVID-19 Pandemic: Qualitative Interview Study. JMIR Aging. 2020;3(1):e19007.

212. Gonzalez-Blanco L, Dal Santo F, Garcia-Alvarez L, de la Fuente-Tomas L, Moya Lacasa C, Paniagua G, et al. COVID-19 lockdown in people with severe mental disorders in Spain: Do they have a specific psychological reaction compared with other mental disorders and healthy controls? Schizophr Res. 2020;223:192-8.

213. González-Sanguino C, Ausín B, Castellanos M, Saiz J, López-Gómez A, Ugidos C, et al. Mental Health Consequences of the Coronavirus 2020 Pandemic (COVID-19) in Spain. A Longitudinal Study. Front Psychiatry. 2020;11:565474.

214. Gonzalez-Sanguino C, Ausin B, Castellanos MA, Saiz J, Lopez-Gomez A, Ugidos C, et al. Mental health consequences during the initial stage of the 2020 Coronavirus pandemic (COVID-19) in Spain. Brain Behav Immun. 2020;87:172-6.

215. González-Sanguino C, Ausín B, Castellanos MA, Saiz J, Muñoz M. Mental health consequences of the Covid-19 outbreak in Spain. A longitudinal study of the alarm situation and return to the new normality. Prog Neuropsychopharmacol Biol Psychiatry. 2021;107:110219.

216. Goodwin R, Hou WK, Sun S, Ben-Ezra M. Psychological and behavioural responses to COVID-19: a China-Britain comparison. J Epidemiol Community Health. 2021;75(2):189-92.

217. Gornicka M, Drywien ME, Zielinska MA, Hamulka J. Dietary and Lifestyle Changes During COVID-19 and the Subsequent Lockdowns among Polish Adults: A Cross-Sectional Online Survey PLifeCOVID-19 Study. Nutrients. 2020;12(8).

218. Greyling T, Rossouw S, Adhikari T. The good, the bad and the ugly of lockdowns during Covid-19. PLoS One. 2021;16(1):e0245546.

219. Grigoletto V, Cognigni M, Occhipinti AA, Abbracciavento G, Carrozzi M, Barbi E, et al. Rebound of Severe Alcoholic Intoxications in Adolescents and Young Adults After COVID-19 Lockdown. J Adolesc Health. 2020;67(5):727-9.

220. Groarke JM, Berry E, Graham-Wisener L, McKenna-Plumley PE, McGlinchey E, Armour C. Loneliness in the UK during the COVID-19 pandemic: Cross-sectional results from the COVID-19 Psychological Wellbeing Study. PLoS One. 2020;15(9):e0239698.

221. Grogan S, Walker L, McChesney G, Gee I, Gough B, Cordero MI. How has COVID-19 lockdown impacted smoking? A thematic analysis of written accounts from UK smokers. Psychology & health. 2020:1-17.

222. Grossman ES, Hoffman YSG, Palgi Y, Shrira A. COVID-19 related loneliness and sleep problems in older adults: Worries and resilience as potential moderators. Pers Individ Dif. 2021;168:110371.

223. Gruber R, Saha S, Somerville G, Boursier J, Wise MS. The impact of COVID-19 related school shutdown on sleep in adolescents: a natural experiment. Sleep Med. 2020;76:33-5.

224. Gualano MR, Lo Moro G, Voglino G, Bert F, Siliquini R. Effects of Covid-19 Lockdown on Mental Health and Sleep Disturbances in Italy. Int J Environ Res Public Health. 2020;17(13).

225. Guerrero MD, Vanderloo LM, Rhodes RE, Faulkner G, Moore SA, Tremblay MS. Canadian children's and youth's adherence to the 24-h movement guidelines during the COVID-19 pandemic: A decision tree analysis. J Sport Health Sci. 2020;9(4):313-21.

226. Guessoum SB, Lachal J, Radjack R, Carretier E, Minassian S, Benoit L, et al. Adolescent psychiatric disorders during the COVID-19 pandemic and lockdown. Psychiatry Res. 2020;291:113264.

227. Gulia KK, Kumar VM. Reverse quarantine in Kerala: managing the 2019 novel coronavirus in a state with a relatively large elderly population. Psychogeriatrics. 2020;20(5):794-5.

228. Gunther-Bel C, Vilaregut A, Carratala E, Torras-Garat S, Perez-Testor C. A Mixed-method Study of Individual, Couple, and Parental Functioning During the State-regulated COVID-19 Lockdown in Spain. Fam Process. 2020;59(3):1060-79.

229. Guo J, De Carli P, Lodder P, Bakermans-Kranenburg MJ, Riem MME. Maternal mental health during the COVID-19 lockdown in China, Italy, and the Netherlands: a cross-validation study. Psychol Med. 2021:1-11.

230. Guo Q, Zheng Y, Shi J, Wang J, Li G, Li C, et al. Immediate psychological distress in quarantined patients with COVID-19 and its association with peripheral inflammation: A mixed-method study. Brain Behav Immun. 2020;88:17-27.

231. Guo Y, Cheng C, Zeng Y, Li Y, Zhu M, Yang W, et al. Mental Health Disorders and Associated Risk Factors in Quarantined Adults During the COVID-19 Outbreak in China: Cross-Sectional Study. J Med Internet Res. 2020;22(8):e20328.

232. Gupta S, Tang C, Higgs P. Social isolation during Covid-19: Boon or bane to diabetes management. Diabetes Metab Syndr. 2020;14(4):567-8.

233. Gupte HA, Mandal G, Jagiasi D. How has the COVID-19 pandemic affected tobacco users in India: Lessons from an ongoing tobacco cessation program. Tob Prev Cessat. 2020;6:53.

234. Haddad C, Zakhour M, Bou Kheir M, Haddad R, Al Hachach M, Sacre H, et al. Association between eating behavior and quarantine/confinement stressors during the coronavirus disease 2019 outbreak. J Eat Disord. 2020;8:40.

235. Haider I, Tiwana F, Tahir SM. Impact of the COVID-19 Pandemic on Adult Mental Health. Pak J Med Sci. 2020;36(COVID19-S4):S90-S4.

236. Hamermesh DS. Life satisfaction, loneliness and togetherness, with an application to Covid-19 lock-downs. Rev Econ Househ. 2020:1-18.

237. Hamoda HM, Chiumento A, Alonge O, Hamdani SU, Saeed K, Wissow L, et al. Addressing the Consequences of the COVID-19 Lockdown for Children's Mental Health: Investing in School Mental Health Programs. Psychiatr Serv. 2021:appips202000597.

238. Han T, Ma W, Gong H, Hu Y, Zhang Y, Zhang C, et al. Investigation and analysis of negative emotion among university students during home quarantine of COVID-19. Journal of Xi'an Jiaotong University (Medical Sciences). 2021;42(1):132-6.

239. Harris RJ, Downey L, Smith TR, Cummings JRF, Felwick R, Gwiggner M. Life in lockdown: experiences of patients with IBD during COVID-19. BMJ Open Gastroenterol. 2020;7(1).

240. Harrison V, Moulds ML, Jones K. Perceived social support and prenatal wellbeing; The mediating effects of loneliness and repetitive negative thinking on anxiety and depression during the COVID-19 pandemic. Women Birth. 2021.

241. Hartley S, Colas des Francs C, Aussert F, Martinot C, Dagneaux S, Londe V, et al. [The effects of quarantine for SARS-CoV-2 on sleep: An online survey]. Encephale. 2020;46(3S):S53-S9.

242. Havermans T, Houben J, Vermeulen F, Boon M, Proesmans M, Lorent N, et al. The impact of the COVID-19 pandemic on the emotional well-being and home treatment of Belgian patients with cystic fibrosis, including transplanted patients and paediatric patients. J Cyst Fibros. 2020;19(6):880-7.

243. Hazarika M, Das S, Bhandari SS, Sharma P. The psychological impact of the COVID-19 pandemic and associated risk factors during the initial stage among the general population in India. Open J Psychiatry Allied Sci. 2021;12(1):31-5.

244. He M, Xian Y, Lv X, He J, Ren Y. Changes in Body Weight, Physical Activity, and Lifestyle During the Semi-lockdown Period After the Outbreak of COVID-19 in China: An Online Survey. Disaster Med Public Health Prep. 2020:1-6.

245. He Q, Fan B, Xie B, Liao Y, Han X, Chen Y, et al. Mental health conditions among the general population, healthcare workers and quarantined population during the coronavirus disease 2019 (COVID-19) pandemic. Psychol Health Med. 2020:1-13.

246. Hew-Butler T, Smith-Hale V, Van Sumeren M, Sabourin J, Levy P. Is Exercise the Best Medicine during a COVID-19 Pandemic? Comment on Constandt, B.; Thibaut, E.; De Bosscher, V.; Scheerder, J.; Ricour, M.; Willem, A. Exercising in Times of Lockdown: An Analysis of the Impact of COVID-19 on Levels and Patterns of Exercise among Adults in Belgium. Int. J. Environ. Res. Public Health 2020, 17, 4144. Int J Environ Res Public Health. 2020;17(16).

247. Hiremath P, Suhas Kowshik CS, Manjunath M, Shettar M. COVID 19: Impact of lock-down on mental health and tips to overcome. Asian J Psychiatr. 2020;51:102088.

248. Hobin E, Smith B. Is another public health crisis brewing beneath the COVID-19 pandemic? Can J Public Health. 2020;111(3):392-6.

249. Holman EA, Thompson RR, Garfin DR, Silver RC. The unfolding COVID-19 pandemic: A probability-based, nationally representative study of mental health in the United States. Sci Adv. 2020;6(42).

250. Horesh D, Kapel Lev-Ari R, Hasson-Ohayon I. Risk factors for psychological distress during the COVID-19 pandemic in Israel: Loneliness, age, gender, and health status play an important role. Br J Health Psychol. 2020;25(4):925-33.

251. Huber BC, Steffen J, Schlichtiger J, Brunner S. Altered nutrition behavior during COVID-19 pandemic lockdown in young adults. Eur J Nutr. 2020:1-10.

252. Huber BC, Steffen J, Schlichtiger J, Graupe T, Deuster E, Strouvelle VP, et al. Alteration of physical activity during COVID-19 pandemic lockdown in young adults. J Transl Med. 2020;18(1):410.

253. Husain W, Ashkanani F. Does COVID-19 change dietary habits and lifestyle behaviours in Kuwait: a community-based cross-sectional study. Environ Health Prev Med. 2020;25(1):61-.

254. Hyland P, Shevlin M, McBride O, Murphy J, Karatzias T, Bentall RP, et al. Anxiety and depression in the Republic of Ireland during the COVID-19 pandemic. Acta Psychiatr Scand. 2020;142(3):249-56.

255. Imran N, Aamer I, Sharif MI, Bodla ZH, Naveed S. Psychological burden of quarantine in children and adolescents: A rapid systematic review and proposed solutions. Pak J Med Sci. 2020;36(5):1106-16.

256. Imran N, Zeshan M, Pervaiz Z. Mental health considerations for children & adolescents in COVID-19 Pandemic. Pak J Med Sci. 2020;36(COVID19-S4):S67-S72.

257. Ingram J, Maciejewski G, Hand CJ. Changes in Diet, Sleep, and Physical Activity Are Associated With Differences in Negative Mood During COVID-19 Lockdown. Front Psychol. 2020;11:588604.

258. Iqbal SA, Tayyab N. COVID-19 and children: The mental and physical reverberations of the pandemic. Child Care Health Dev. 2021;47(1):136-9.

259. Irmak AY, Çelikkalp Ü, Ekuklu G. Evaluation of the chronic disease management and depression levels of people over 65 years of age during the COVID-19 pandemic period. Perspect Psychiatr Care. 2020.

260. Jacob L, Smith L, Armstrong NC, Yakkundi A, Barnett Y, Butler L, et al. Alcohol use and mental health during COVID-19 lockdown: A cross-sectional study in a sample of UK adults. Drug Alcohol Depend. 2021;219:108488.

261. Jacobi F. [Ride out domestic isolation and quarantine]. Psychotherapeut (Berl). 2020:1-5.

262. Jacobson NC, Lekkas D, Price G, Heinz MV, Song M, O'Malley AJ, et al. Flattening the Mental Health Curve: COVID-19 Stay-at-Home Orders Are Associated With Alterations in Mental Health Search Behavior in the United States. JMIR Ment Health. 2020;7(6):e19347.

263. Janati Idrissi A, Lamkaddem A, Benouajjit A, Ben El Bouaazzaoui M, El Houari F, Alami M, et al. Sleep quality and mental health in the context of COVID-19 pandemic and lockdown in Morocco. Sleep Med. 2020;74:248-53.

264. Janiri D, Petracca M, Moccia L, Tricoli L, Piano C, Bove F, et al. COVID-19 Pandemic and Psychiatric Symptoms: The Impact on Parkinson's Disease in the Elderly. Front Psychiatry. 2020;11:581144.

265. Janssen X, Fleming L, Kirk A, Rollins L, Young D, Grealy M, et al. Changes in Physical Activity, Sitting and Sleep across the COVID-19 National Lockdown Period in Scotland. Int J Environ Res Public Health. 2020;17(24).

266. Jesus I, Vanhee V, Deramaudt TB, Bonay M. Promising effects of exercise on the cardiovascular, metabolic and immune system during COVID-19 period. J Hum Hypertens. 2021;35(1):1-3.

267. Jia P. A changed research landscape of youth's obesogenic behaviours and environments in the post-COVID-19 era. Obes Rev. 2020.

268. Jia P, Liu L, Xie X, Yuan C, Chen H, Guo B, et al. Changes in dietary patterns among youths in China during COVID-19 epidemic: The COVID-19 impact on lifestyle change survey (COINLICS). Appetite. 2021;158:105015.

269. Jia P, Zhang L, Yu W, Yu B, Liu M, Zhang D, et al. Impact of COVID-19 lockdown on activity patterns and weight status among youths in China: the COVID-19 Impact on Lifestyle Change Survey (COINLICS). Int J Obes (Lond). 2021;45(3):695-9.

270. Jiang Z, Zhu P, Wang L, Hu Y, Pang M, Ma S, et al. Psychological distress and sleep quality of COVID-19 patients in Wuhan, a lockdown city as the epicenter of COVID-19. Journal of psychiatric research. 2020:S0022-3956(20)31037-2.

271. Jimenez A, de Hollanda A, Palou E, Ortega E, Andreu A, Molero J, et al. Psychosocial, Lifestyle, and Body Weight Impact of COVID-19-Related Lockdown in a Sample of Participants with Current or Past History of Obesity in Spain. Obes Surg. 2021:1-10.

272. Jimenez-Pavon D, Carbonell-Baeza A, Lavie CJ. Physical exercise as therapy to fight against the mental and physical consequences of COVID-19 quarantine: Special focus in older people. Prog Cardiovasc Dis. 2020;63(3):386-8.

273. Joyce AA, Styklunas GM, Rigotti NA, Neil JM, Park ER, Kruse GR. Quit Experiences among Primary Care Patients Enrolled in a Smoking Cessation Pilot RCT Early in the COVID-19 Pandemic. Int J Environ Res Public Health. 2021;18(3).

274. Juan Y, Yuanyuan C, Qiuxiang Y, Cong L, Xiaofeng L, Yundong Z, et al. Psychological distress surveillance and related impact analysis of hospital staff during the COVID-19 epidemic in Chongqing, China. Compr Psychiatry. 2020;103:152198.

275. Jurak G, Morrison SA, Leskosek B, Kovac M, Hadzic V, Vodicar J, et al. Physical activity recommendations during the coronavirus disease-2019 virus outbreak. J Sport Health Sci. 2020;9(4):325-7.

276. Jurblum M, Ng C, Castle D. Psychological consequences of social isolation and quarantine. Australian Journal for General Practitioners. 2020;49:778-83.

277. Kalron A, Dolev M, Greenberg-Abrahami M, Menascu S, Frid L, Avrech-Shezifi S, et al. Physical activity behavior in people with multiple sclerosis during the COVID-19 pandemic in Israel: Results of an online survey. Mult Scler Relat Disord. 2021;47:102603.

278. Kamberi F, Jaho J, Mechili EA, Sinaj E, Skendo H. Effect of Covid-19 pandemic on mental health among Albanian people residing in the country and abroad - Implications for mental care. Arch Psychiatr Nurs. 2020;34(6):507-12.

279. Kamyuka D, Carlin L, McPherson G, Misener L. Access to Physical Activity and Sport and the Effects of Isolation and Cordon Sanitaire During COVID-19 for People With Disabilities in Scotland and Canada. Front Sports Act Living. 2020;2:594501.

280. Kandel S, Lamsal M, Yadav SA, Bhandari D, Adhikari G, Poudel S, et al. Lifestyle, behavior, perception and practices of Nepalese during lockdown due to COVID-19 pandemic. JNMA J Nepal Med Assoc. 2020;58(229):690-5.

281. Kang E, Lee SY, Kim MS, Jung H, Kim KH, Kim KN, et al. The Psychological Burden of COVID-19 Stigma: Evaluation of the Mental Health of Isolated Mild Condition COVID-19 Patients. J Korean Med Sci. 2021;36(3):e33.

282. Kang S, Sun Y, Zhang X, Sun F, Wang B, Zhu W. Is Physical Activity Associated with Mental Health among Chinese Adolescents during Isolation in COVID-19 Pandemic? J Epidemiol Glob Health. 2020.

283. Kantermann T. Behavior: How a Global Social Lockdown Unlocks Time for Sleep. Curr Biol. 2020;30(14):R822-R3.

284. Kaparounaki CK, Patsali ME, Mousa DV, Papadopoulou EVK, Papadopoulou KKK, Fountoulakis KN. University students' mental health amidst the COVID-19 quarantine in Greece. Psychiatry Res. 2020;290:113111.

285. Karatas S, Yesim T, Beysel S. Impact of lockdown COVID-19 on metabolic control in type 2 diabetes mellitus and healthy people. Primary Care Diabetes. 2021.

286. Katsoulis M, Pasea L, Lai AG, Dobson RJB, Denaxas S, Hemingway H, et al. Obesity during the COVID-19 pandemic: both cause of high risk and potential effect of lockdown? A population-based electronic health record study. Public Health. 2020;191:41-7.

287. Kaur H, Singh T, Arya YK, Mittal S. Physical Fitness and Exercise During the COVID-19 Pandemic: A Qualitative Enquiry. Front Psychol. 2020;11:590172.

288. Kaushal N, Keith N, Aguinaga S, Hagger MS. Social Cognition and Socioecological Predictors of Home-Based Physical Activity Intentions, Planning, and Habits during the COVID-19 Pandemic. Behav Sci (Basel). 2020;10(9).

289. Kendrick K, Isaac M. Mental health impact of COVID-19: Australian perspective. Indian J Psychiatry. 2020;62(Suppl 3):S373-s6.

290. Khader MA, Jabeen T, Namoju R. A cross sectional study reveals severe disruption in glycemic control in people with diabetes during and after lockdown in India. Diabetes Metab Syndr. 2020;14(6):1579-84.

291. Khan AH, Sultana MS, Hossain S, Hasan MT, Ahmed HU, Sikder MT. The impact of COVID-19 pandemic on mental health & wellbeing among home-quarantined Bangladeshi students: A cross-sectional pilot study. J Affect Disord. 2020;277:121-8.

292. Khoramipour K, Basereh A, Hekmatikar AA, Castell L, Ruhee RT, Suzuki K. Physical activity and nutrition guidelines to help with the fight against COVID-19. J Sports Sci. 2021;39(1):101-7.

293. Kilani HA, Bataineh MF, Al-Nawayseh A, Atiyat K, Obeid O, Abu-Hilal MM, et al. Healthy lifestyle behaviors are major predictors of mental wellbeing during COVID-19 pandemic confinement: A study on adult Arabs in higher educational institutions. PLoS One. 2020;15(12):e0243524.

294. Killgore WDS, Cloonan SA, Taylor EC, Fernandez F, Grandner MA, Dailey NS. Suicidal ideation during the COVID-19 pandemic: The role of insomnia. Psychiatry Res. 2020;290:113134.

295. Killgore WDS, Cloonan SA, Taylor EC, Lucas DA, Dailey NS. Alcohol dependence during COVID-19 lockdowns. Psychiatry Res. 2021;296:113676.

296. Kim JU, Majid A, Judge R, Crook P, Nathwani R, Selvapatt N, et al. Effect of COVID-19 lockdown on alcohol consumption in patients with pre-existing alcohol use disorder. Lancet Gastroenterol Hepatol. 2020;5(10):886-7.

297. King DL, Delfabbro PH, Billieux J, Potenza MN. Problematic online gaming and the COVID-19 pandemic. J Behav Addict. 2020;9(2):184-6.

298. Ko CH, Yen JY. Impact of COVID-19 on gaming disorder: Monitoring and prevention. J Behav Addict. 2020;9(2):187-9.

299. Kocevska D, Blanken TF, Van Someren EJW, Rosler L. Sleep quality during the COVID-19 pandemic: not one size fits all. Sleep Med. 2020;76:86-8.

300. Kofman YB, Garfin DR. Home is not always a haven: The domestic violence crisis amid the COVID-19 pandemic. Psychol Trauma. 2020;12(S1):S199-S201.

301. Kokou-Kpolou CK, Megalakaki O, Laimou D, Kousouri M. Insomnia during COVID-19 pandemic and lockdown: Prevalence, severity, and associated risk factors in French population. Psychiatry Res. 2020;290:113128.

302. Kowal M, Coll-Martín T, Ikizer G, Rasmussen J, Eichel K, Studzińska A, et al. Who is the Most Stressed During the COVID-19 Pandemic? Data From 26 Countries and Areas. Appl Psychol Health Well Being. 2020;12(4):946-66.

303. Kriaucioniene V, Bagdonaviciene L, Rodríguez-Pérez C, Petkeviciene J. Associations between Changes in Health Behaviours and Body Weight during the COVID-19 Quarantine in Lithuania: The Lithuanian COVIDiet Study. Nutrients. 2020;12(10).

304. Kuang Y, Shen M, Wang Q, Xiao Y, Lv C, Luo Y, et al. Association of outdoor activity restriction and income loss with patient-reported outcomes of psoriasis during the COVID-19 pandemic: A web-based survey. J Am Acad Dermatol. 2020;83(2):670-2.

305. Lahiri A, Jha SS, Acharya R, Dey A, Chakraborty A. Correlates of insomnia among the adults during COVID19 pandemic: evidence from an online survey in India. Sleep Med. 2021;77:66-73.

306. Lakhan R, Agrawal A, Sharma M. Prevalence of Depression, Anxiety, and Stress during COVID-19 Pandemic. Journal of neurosciences in rural practice. 2020;11(4):519-25.

307. Lakicevic N, Moro T, Paoli A, Roklicer R, Trivic T, Cassar S, et al. Stay fit, don't quit: Geriatric Exercise Prescription in COVID-19 Pandemic. Aging Clin Exp Res. 2020;32(7):1209-10.

308. Lange S, Probst C, Rehm J. Coronavirus disease 2019 crisis and intentional injuries: now is not the time to erode alcohol control policies. Can J Public Health. 2020;111(4):466-8.

309. Lawal AM, Alhassan EO, Mogaji HO, Odoh IM, Essien EA. Differential effect of gender, marital status, religion, ethnicity, education and employment status on mental health during COVID-19 lockdown in Nigeria. Psychol Health Med. 2020:1-12.

310. Lebel C, MacKinnon A, Bagshawe M, Tomfohr-Madsen L, Giesbrecht G. Elevated depression and anxiety symptoms among pregnant individuals during the COVID-19 pandemic. J Affect Disord. 2020;277:5-13.

311. Lecuelle F, Leslie W, Huguelet S, Franco P, Putois B. Did the COVID-19 lockdown really have no impact on young children's sleep? J Clin Sleep Med. 2020;16(12):2121.

312. Lee PH, Marek J, Nalevka P. Crowdsourced smartphone data reveal altered sleep/wake pattern in quarantined Chinese during the COVID-19 outbreak. Chronobiol Int. 2020;37(8):1181-90.

313. Lee PH, Marek J, Nálevka P. Sleep pattern in the US and 16 European countries during the COVID-19 outbreak using crowdsourced smartphone data. Eur J Public Health. 2021;31(1):23-30.

314. Lee SA, Mathis AA, Jobe MC, Pappalardo EA. Clinically significant fear and anxiety of COVID-19: A psychometric examination of the Coronavirus Anxiety Scale. Psychiatry Res. 2020;290:113112.

315. Lee SJ, Ward KP, Lee JY, Rodriguez CM. Parental Social Isolation and Child Maltreatment Risk during the COVID-19 Pandemic. J Fam Violence. 2021:1-12.

316. Leger D, Beck F, Fressard L, Verger P, Peretti-Watel P, Group C. Poor sleep associated with overuse of media during the COVID-19 lockdown. Sleep. 2020;43(10).

317. Leone MJ, Sigman M, Golombek D. Effects of social isolation on human sleep and chronotype during the COVID-19 pandemic. CURRENT-BIOLOGY-D-20-01055. 2020.

318. Leone MJ, Sigman M, Golombek DA. Effects of lockdown on human sleep and chronotype during the COVID-19 pandemic. Curr Biol. 2020;30(16):R930-R1.

319. Letieri RV, Furtado GE. Physical exercise during coronavirus disease (COVID-19): Recommendations to remaining active in periods of confinement. An Acad Bras Cienc. 2020;92(4):e20200691.

320. Lev Bar-Or R, Shalit N, Shpitzer R, Kor A, Lev-Ran S. Self-reported changes in use of addictive substances and behaviors among patients treated in an addiction treatment clinic during the COVID-19 quarantine. Isr Med Assoc J. 2021;23(1):11.

321. Li W, Zhang Y, Wang J, Ozaki A, Wang Q, Chen Y, et al. Association of Home Quarantine and Mental Health Among Teenagers in Wuhan, China, During the COVID-19 Pandemic. JAMA Pediatr. 2021.

322. Lim S, Shin SM, Nam GE, Jung CH, Koo BK. Proper Management of People with Obesity during the COVID-19 Pandemic. J Obes Metab Syndr. 2020;29(2):84-98.

323. Lima CKT, Carvalho PMM, Lima I, Nunes J, Saraiva JS, de Souza RI, et al. The emotional impact of Coronavirus 2019-nCoV (new Coronavirus disease). Psychiatry Res. 2020;287:112915.

324. Lippi G, Henry BM, Bovo C, Sanchis-Gomar F. Health risks and potential remedies during prolonged lockdowns for coronavirus disease 2019 (COVID-19). Diagnosis (Berl). 2020;7(2):85-90.

325. Lippi G, Henry BM, Sanchis-Gomar F. Physical inactivity and cardiovascular disease at the time of coronavirus disease 2019 (COVID-19). Eur J Prev Cardiol. 2020;27(9):906-8.

326. Lipskaya-Velikovsky L. COVID-19 Isolation in Healthy Population in Israel: Challenges in Daily Life, Mental Health, Resilience, and Quality of Life. Int J Environ Res Public Health. 2021;18(3):999.

327. Liu S, Heinzel S, Haucke MN, Heinz A. Increased Psychological Distress, Loneliness, and Unemployment in the Spread of COVID-19 over 6 Months in Germany. Medicina (Kaunas). 2021;57(1).

328. López J, Perez-Rojo G, Noriega C, Carretero I, Velasco C, Martinez-Huertas JA, et al. Psychological well-being among older adults during the COVID-19 outbreak: a comparative study of the young-old and the old-old adults. Int Psychogeriatr. 2020;32(11):1365-70.

329. Lopez-Bueno R, Calatayud J, Casana J, Casajus JA, Smith L, Tully MA, et al. COVID-19 Confinement and Health Risk Behaviors in Spain. Front Psychol. 2020;11:1426.

330. Lopez-Bueno R, Calatayud J, Ezzatvar Y, Casajus JA, Smith L, Andersen LL, et al. Association Between Current Physical Activity and Current Perceived Anxiety and Mood in the Initial Phase of COVID-19 Confinement. Front Psychiatry. 2020;11:729.

331. López-Bueno R, López-Sánchez GF, Casajús JA, Calatayud J, Gil-Salmerón A, Grabovac I, et al. Health-related behaviors among school-aged children and adolescents during the Spanish Covid-19 confinement. Frontiers in pediatrics. 2020;8.

332. Lopez-Gil JF, Tremblay MS, Brazo-Sayavera J. Changes in Healthy Behaviors and Meeting 24-h Movement Guidelines in Spanish and Brazilian Preschoolers, Children and Adolescents during the COVID-19 Lockdown. Children (Basel). 2021;8(2).

333. Lopez-Moreno M, Lopez MTI, Miguel M, Garces-Rimon M. Physical and Psychological Effects Related to Food Habits and Lifestyle Changes Derived from Covid-19 Home Confinement in the Spanish Population. Nutrients. 2020;12(11).

334. Losada-Baltar A, Martínez-Huertas J, Jiménez-Gonzalo L, Pedroso-Chaparro MDS, Gallego-Alberto L, Fernandes-Pires J, et al. Longitudinal correlates of loneliness and psychological distress during the lockdown situation due to COVID-19. Effects of age and self-perceptions of aging. J Gerontol B Psychol Sci Soc Sci. 2021.

335. Louvardi M, Pelekasis P, Chrousos GP, Darviri C. Mental health in chronic disease patients during the COVID-19 quarantine in Greece. Palliat Support Care. 2020;18(4):394-9.

336. Lozupone M, La Montagna M, Di Gioia I, Sardone R, Resta E, Daniele A, et al. Social Frailty in the COVID-19 Pandemic Era. Front Psychiatry. 2020;11:577113.

337. Lu H, Nie P, Qian L. Do Quarantine Experiences and Attitudes Towards COVID-19 Affect the Distribution of Mental Health in China? A Quantile Regression Analysis. Appl Res Qual Life. 2020:1-18.

338. Luciano F, Cenacchi V, Vegro V, Pavei G. COVID-19 lockdown: Physical activity, sedentary behaviour and sleep in Italian medicine students. Eur J Sport Sci. 2020:1-10.

339. Luo M, Guo L, Yu M, Jiang W, Wang H. The psychological and mental impact of coronavirus disease 2019 (COVID-19) on medical staff and general public - A systematic review and meta-analysis. Psychiatry Res. 2020;291:113190.

340. Luzi L, Radaelli MG. Influenza and obesity: its odd relationship and the lessons for COVID-19 pandemic. Acta Diabetol. 2020;57(6):759-64.

341. Ma YF, Li W, Deng HB, Wang L, Wang Y, Wang PH, et al. Prevalence of depression and its association with quality of life in clinically stable patients with COVID-19. J Affect Disord. 2020;275:145-8.

342. Macdonald B, Hülür G. Well-Being and Loneliness in Swiss Older Adults During the COVID-19 Pandemic: The Role of Social Relationships. Gerontologist. 2021;61(2):240-50.

343. Machado PPP, Pinto-Bastos A, Ramos R, Rodrigues TF, Louro E, Gonçalves S, et al. Impact of COVID-19 lockdown measures on a cohort of eating disorders patients. J Eat Disord. 2020;8(1):57.

344. Madani A, Boutebal SE, Bryant CR. The Psychological Impact of Confinement Linked to the Coronavirus Epidemic COVID-19 in Algeria. Int J Environ Res Public Health. 2020;17(10).

345. Maertl T, De Bock F, Huebl L, Oberhauser C, Coenen M, Jung-Sievers C, et al. Physical Activity during COVID-19 in German Adults: Analyses in the COVID-19 Snapshot Monitoring Study (COSMO). Int J Environ Res Public Health. 2021;18(2).

346. Maguire S, O'Shea F. Social isolation due to the COVID-19 pandemic has led to worse outcomes in females with inflammatory arthritis. Ir J Med Sci. 2021;190(1):33-8.

347. Mahaffey BL. COVID-19 Guidelines for Sports and Physical Activity. Mo Med. 2020;117(3):205-6.

348. Majid U, Bakshi S, Truong J, Wasim A. Sustaining Social Distancing and Mass Quarantine in the COVID-19 Era: Lessons Learned. Healthc Q. 2020;23(2):21-3.

349. Majumdar P, Biswas A, Sahu S. COVID-19 pandemic and lockdown: cause of sleep disruption, depression, somatic pain, and increased screen exposure of office workers and students of India. Chronobiol Int. 2020;37(8):1191-200.

350. Malanchini G, Malacrida M, Ferrari P, Leidi C, Ferrari G, Racheli M, et al. Impact of the Coronavirus Disease-19 Outbreak on Physical Activity of Patients With Implantable Cardioverter Defibrillators. J Card Fail. 2020;26(10):898-9.

351. Malhotra N, Kunal S. The catch-22 of the COVID-19 "lockdown". Adv Respir Med. 2020;88(3):285-6.

352. Malkawi SH, Almhdawi K, Jaber AF, Alqatarneh NS. COVID-19 Quarantine-Related Mental Health Symptoms and their Correlates among Mothers: A Cross Sectional Study. Matern Child Health J. 2020:1-11.

353. Mallet J, Dubertret C, Le Strat Y. Addictions in the COVID-19 era: Current evidence, future perspectives a comprehensive review. Prog Neuropsychopharmacol Biol Psychiatry. 2021;106:110070.

354. Mamun MA, Sakib N, Gozal D, Bhuiyan AI, Hossain S, Bodrud-Doza M, et al. The COVID-19 pandemic and serious psychological consequences in Bangladesh: A population-based nationwide study. J Affect Disord. 2021;279:462-72.

355. Manyoni MJ, Abader MI. The effects of the COVID-19 lockdown and alcohol restriction on trauma-related emergency department cases in a South African regional hospital. African Journal of Emergency Medicine. 2021.

356. Marcal IR, Fernandes B, Viana AA, Ciolac EG. The Urgent Need for Recommending Physical Activity for the Management of Diabetes During and Beyond COVID-19 Outbreak. Front Endocrinol (Lausanne). 2020;11:584642.

357. Marchitelli S, Mazza C, Lenzi A, Ricci E, Gnessi L, Roma P. Weight Gain in a Sample of Patients Affected by Overweight/Obesity with and without a Psychiatric Diagnosis during the Covid-19 Lockdown. Nutrients. 2020;12(11).

358. Marco-Ahulló A, Montesinos-Magraner L, González LM, Morales J, Bernabéu-García JA, García-Massó X. Impact of COVID-19 on the self-reported physical activity of people with complete thoracic spinal cord injury full-time manual wheelchair users. J Spinal Cord Med. 2021:1-5.

359. Marcos-Pardo PJ, Espeso-Garcia A, Lopez-Vivancos A, Abelleira Lamela T, Keogh JWL. COVID-19 and Social Isolation: A Case for Why Home-Based Resistance Training Is Needed to Maintain Musculoskeletal and Psychosocial Health for Older Adults. J Aging Phys Act. 2020:1-7.

360. Marelli S, Castelnuovo A, Somma A, Castronovo V, Mombelli S, Bottoni D, et al. Impact of COVID-19 lockdown on sleep quality in university students and administration staff. J Neurol. 2021;268(1):8-15.

361. Margaritis I, Houdart S, El Ouadrhiri Y, Bigard X, Vuillemin A, Duche P. How to deal with COVID-19 epidemic-related lockdown physical inactivity and sedentary increase in youth? Adaptation of Anses' benchmarks. Arch Public Health. 2020;78:52.

362. Martinez-de-Quel O, Suarez-Iglesias D, Lopez-Flores M, Perez CA. Physical activity, dietary habits and sleep quality before and during COVID-19 lockdown: A longitudinal study. Appetite. 2021;158:105019.

363. Martínez-Lezaun I, Santamaría-Vázquez M, Del Líbano M. Influence of Confinement by COVID-19 on the Quality of Sleep and the Interests of University Students. Nat Sci Sleep. 2020;12:1075-81.

364. Martino M, Aboud N, Cola MF, Giancola G, Ciarloni A, Salvio G, et al. Impact of COVID-19 pandemic on psychophysical stress in patients with adrenal insufficiency: the CORTI-COVID study. J Endocrinol Invest. 2020:1-10.

365. Marty L, de Lauzon-Guillain B, Labesse M, Nicklaus S. Food choice motives and the nutritional quality of diet during the COVID-19 lockdown in France. Appetite. 2021;157:105005.

366. Massad I, Al-Taher R, Massad F, Al-Sabbagh MQ, Haddad M, Abufaraj M. The impact of the COVID-19 pandemic on mental health: early quarantine-related anxiety and its correlates among Jordanians. East Mediterr Health J. 2020;26(10):1165-72.

367. Mathias K, Rawat M, Philip S, Grills N. "We've got through hard times before: acute mental distress and coping among disadvantaged groups during COVID-19 lockdown in North India - a qualitative study". Int J Equity Health. 2020;19(1):224.

368. Matias T, Dominski FH, Marks DF. Human needs in COVID-19 isolation. J Health Psychol. 2020;25(7):871-82.

369. Matovu JKB, Kabwama SN, Ssekamatte T, Ssenkusu J, Wanyenze RK. COVID-19 Awareness, Adoption of COVID-19 Preventive Measures, and Effects of COVID-19 Lockdown Among Adolescent Boys and Young Men in Kampala, Uganda. J Community Health. 2021:1-12.

370. Mattioli AV, Ballerini Puviani M. Lifestyle at Time of COVID-19: How Could Quarantine Affect Cardiovascular Risk. Am J Lifestyle Med. 2020;14(3):240-2.

371. Mattioli AV, Ballerini Puviani M, Nasi M, Farinetti A. COVID-19 pandemic: the effects of quarantine on cardiovascular risk. Eur J Clin Nutr. 2020;74(6):852-5.

372. Mattioli AV, Nasi M, Cocchi C, Farinetti A. COVID-19 outbreak: impact of the quarantine-induced stress on cardiovascular disease risk burden. Future Cardiol. 2020;16(6):539-42.

373. Mattioli AV, Pinti M, Farinetti A, Nasi M. Obesity risk during collective quarantine for the COVID-19 epidemic. Obes Med. 2020;20:100263.

374. Mattioli AV, Sciomer S, Cocchi C, Maffei S, Gallina S. Quarantine during COVID-19 outbreak: Changes in diet and physical activity increase the risk of cardiovascular disease. Nutr Metab Cardiovasc Dis. 2020;30(9):1409-17.

375. Maugeri G, Castrogiovanni P, Battaglia G, Pippi R, D'Agata V, Palma A, et al. The impact of physical activity on psychological health during Covid-19 pandemic in Italy. Heliyon. 2020;6(6):e04315.

376. Mazza C, Ricci E, Biondi S, Colasanti M, Ferracuti S, Napoli C, et al. A Nationwide Survey of Psychological Distress among Italian People during the COVID-19 Pandemic: Immediate Psychological Responses and Associated Factors. Int J Environ Res Public Health. 2020;17(9).

377. Mazza M, Marano G, Antonazzo B, Cavarretta E, Di Nicola M, Janiri L, et al. What about heart and mind in the covid-19 era? Minerva Cardioangiol. 2020.

378. McAtamney K, Mantzios M, Egan H, Wallis DJ. Emotional eating during COVID-19 in the United Kingdom: Exploring the roles of alexithymia and emotion dysregulation. Appetite. 2021;161:105120.

379. McCarthy H, Potts HWW, Fisher A. Physical Activity Behavior Before, During, and After COVID-19 Restrictions: Longitudinal Smartphone-Tracking Study of Adults in the United Kingdom. J Med Internet Res. 2021;23(2):e23701.

380. Meda N, Slongo I. Caution when linking COVID-19 to mental health consequences. Brain Behav Immun. 2020;87:152.

381. Medina-Mora ME, Cordero-Oropeza M, Rafful C, Real T, Villatoro-Velazquez JA. COVID-19 and alcohol in Mexico: A serious health crisis, strong actions on alcohol in response-Commentary on Stockwell et al. Drug Alcohol Rev. 2021;40(1):13-6.

382. Méndez-Giménez A, Cecchini JA, Fernández-Río J, Carriedo A. Physical Activity and Prevention of Depressive Symptoms in the Spanish Population during Confinement due to COVID-19. Psicothema. 2021;33(1):111-7.

383. Meyer J, Herring M, McDowell C, Lansing J, Brower C, Schuch F, et al. Joint prevalence of physical activity and sitting time during COVID-19 among US adults in April 2020. Prev Med Rep. 2020;20:101256.

384. Meyer J, McDowell C, Lansing J, Brower C, Smith L, Tully M, et al. Changes in Physical Activity and Sedentary Behavior in Response to COVID-19 and Their Associations with Mental Health in 3052 US Adults. Int J Environ Res Public Health. 2020;17(18).

385. Mittal VA, Firth J, Kimhy D. Combating the Dangers of Sedentary Activity on Child and Adolescent Mental Health During the Time of COVID-19. J Am Acad Child Adolesc Psychiatry. 2020;59(11):1197-8.

386. Moccia L, Janiri D, Pepe M, Dattoli L, Molinaro M, De Martin V, et al. Affective temperament, attachment style, and the psychological impact of the COVID-19 outbreak: an early report on the Italian general population. Brain Behav Immun. 2020;87:75-9.

387. Mon-López D, Bernardez-Vilaboa R, Fernandez-Balbuena AA, Sillero-Quintana M. The Influence of COVID-19 Isolation on Physical Activity Habits and Its Relationship with Convergence Insufficiency. Int J Environ Res Public Health. 2020;17(20).

388. Mondal C, Adak D, Majumder A, Bairagi N. Mitigating the transmission of infection and death due to SARS-CoV-2 through non-pharmaceutical interventions and repurposing drugs. ISA Trans. 2020.

389. Moore SA, Faulkner G, Rhodes RE, Brussoni M, Chulak-Bozzer T, Ferguson LJ, et al. Impact of the COVID-19 virus outbreak on movement and play behaviours of Canadian children and youth: a national survey. Int J Behav Nutr Phys Act. 2020;17(1):85.

390. Morales-Vives F, Dueñas JM, Vigil-Colet A, Camarero-Figuerola M. Psychological Variables Related to Adaptation to the COVID-19 Lockdown in Spain. Front Psychol. 2020;11:565634.

391. Moro T, Paoli A. When COVID-19 affects muscle: effects of quarantine in older adults. Eur J Transl Myol. 2020;30(2):9069.

392. Mortazavi SS, Assari S, Alimohamadi A, Rafiee M, Shati M. Fear, Loss, Social Isolation, and Incomplete Grief Due to COVID-19: A Recipe for a Psychiatric Pandemic. Basic Clin Neurosci. 2020;11(2):225-32.

393. Mousavi SF. Psychological Well-Being, Marital Satisfaction, and Parental Burnout in Iranian Parents: The Effect of Home Quarantine During COVID-19 Outbreaks. Front Psychol. 2020;11:553880.

394. Muhammad DG, Abubakar IA. COVID-19 lockdown may increase cardiovascular disease risk factors. Egypt Heart J. 2021;73(1):2.

395. Mukherjee A, Bandopadhyay G, Chatterjee SS. COVID-19 pandemic: mental health and beyond - the Indian perspective. Ir J Psychol Med. 2020:1-5.

396. Mukherjee S. Disparities, desperation, and divisiveness: Coping with COVID-19 in India. Psychol Trauma. 2020;12(6):582-4.

397. Mukhtar S. Psychological health during the coronavirus disease 2019 pandemic outbreak. Int J Soc Psychiatry. 2020;66(5):512-6.

398. Murphy B, Benson T, McCloat A, Mooney E, Elliott C, Dean M, et al. Changes in Consumers' Food Practices during the COVID-19 Lockdown, Implications for Diet Quality and the Food System: A Cross-Continental Comparison. Nutrients. 2020;13(1).

399. Nachimuthu S, Vijayalakshmi R, Sudha M, Viswanathan V. Coping with diabetes during the COVID - 19 lockdown in India: Results of an online pilot survey. Diabetes Metab Syndr. 2020;14(4):579-82.

400. Nader J, Anselmi A, Tomasi J, Martin A, Aymami M, Rouze S, et al. Adult cardiac surgery during COVID-19 lockdown: Impact on activity and outcomes in a high-volume centre. Arch Cardiovasc Dis. 2021.

401. Nadkarni A, Kapoor A, Pathare S. COVID-19 and forced alcohol abstinence in India: The dilemmas around ethics and rights. Int J Law Psychiatry. 2020;71:101579.

402. Narasimha VL, Shukla L, Mukherjee D, Menon J, Huddar S, Panda UK, et al. Complicated Alcohol Withdrawal-An Unintended Consequence of COVID-19 Lockdown. Alcohol Alcohol. 2020;55(4):350-3.

403. Narici M, De Vito G, Franchi M, Paoli A, Moro T, Marcolin G, et al. Impact of sedentarism due to the COVID-19 home confinement on neuromuscular, cardiovascular and metabolic health: Physiological and pathophysiological implications and recommendations for physical and nutritional countermeasures. Eur J Sport Sci. 2020:1-22.

404. Natividade MDS, Bernardes K, Pereira M, Miranda SS, Bertoldo J, Teixeira MDG, et al. Social distancing and living conditions in the pandemic COVID-19 in Salvador-Bahia, Brazil. Cien Saude Colet. 2020;25(9):3385-92.

405. Naughton F, Ward E, Khondoker M, Belderson P, Marie Minihane A, Dainty J, et al. Health behaviour change during the UK COVID‐19 lockdown: Findings from the first wave of the C‐19 health behaviour and well‐being daily tracker study. British Journal of Health Psychology. 2020.

406. Neill E, Meyer D, Toh WL, van Rheenen TE, Phillipou A, Tan EJ, et al. Alcohol use in Australia during the early days of the COVID-19 pandemic: Initial results from the COLLATE project. Psychiatry Clin Neurosci. 2020;74(10):542-9.

407. Ngoc Cong Duong K, Nguyen Le Bao T, Thi Lan Nguyen P, Vo Van T, Phung Lam T, Pham Gia A, et al. Psychological Impacts of COVID-19 During the First Nationwide Lockdown in Vietnam: Web-Based, Cross-Sectional Survey Study. JMIR Form Res. 2020;4(12):e24776.

408. Nguyen THD, Vu DC. Impacts of the COVID-19 pandemic upon mental health: Perspectives from Vietnam. Psychol Trauma. 2020;12(5):480-1.

409. Nicodemo M, Spreghini MR, Manco M, Wietrzykowska Sforza R, Morino G. Childhood Obesity and COVID-19 Lockdown: Remarks on Eating Habits of Patients Enrolled in a Food-Education Program. Nutrients. 2021;13(2).

410. Nilima N, Kaushik S, Tiwary B, Pandey PK. Psycho-social factors associated with the nationwide lockdown in India during COVID- 19 pandemic. Clin Epidemiol Glob Health. 2021;9:47-52.

411. O'Sullivan K, Clark S, McGrane A, Rock N, Burke L, Boyle N, et al. A Qualitative Study of Child and Adolescent Mental Health during the COVID-19 Pandemic in Ireland. Int J Environ Res Public Health. 2021;18(3):1062.

412. Odone A, Lugo A, Amerio A, Borroni E, Bosetti C, Carreras G, et al. COVID-19 lockdown impact on lifestyle habits of Italian adults. Acta Biomed. 2020;91(9-S):87-9.

413. Odriozola-Gonzalez P, Planchuelo-Gomez A, Irurtia MJ, de Luis-Garcia R. Psychological effects of the COVID-19 outbreak and lockdown among students and workers of a Spanish university. Psychiatry Res. 2020;290:113108.

414. Ogden RS. The passage of time during the UK Covid-19 lockdown. PLoS One. 2020;15(7):e0235871.

415. Okely JA, Corley J, Welstead M, Taylor AM, Page D, Skarabela B, et al. Change in Physical Activity, Sleep Quality, and Psychosocial Variables during COVID-19 Lockdown: Evidence from the Lothian Birth Cohort 1936. Int J Environ Res Public Health. 2020;18(1).

416. Okruszek Ł, Aniszewska-Stańczuk A, Piejka A, Wiśniewska M, Żurek K. Safe but Lonely? Loneliness, Anxiety, and Depression Symptoms and COVID-19. Front Psychol. 2020;11:579181.

417. Olickal JJ, Chinnakali P, Suryanarayana BS, Ulaganeethi R, Kumar SS, Saya GK. Effect of COVID19 pandemic and national lockdown on persons with diabetes from rural areas availing care in a tertiary care center, southern India. Diabetes Metab Syndr. 2020;14(6):1967-72.

418. Ong JL, Lau T, Massar SAA, Chong ZT, Ng BKL, Koek D, et al. COVID-19-related mobility reduction: heterogenous effects on sleep and physical activity rhythms. Sleep. 2021;44(2).

419. Önmez A, Gamsızkan Z, Özdemir Ş, Kesikbaş E, Gökosmanoğlu F, Torun S, et al. The effect of COVID-19 lockdown on glycemic control in patients with type 2 diabetes mellitus in Turkey. Diabetes Metab Syndr. 2020;14(6):1963-6.

420. Orgilés M, Morales A, Delvecchio E, Mazzeschi C, Espada JP. Immediate Psychological Effects of the COVID-19 Quarantine in Youth From Italy and Spain. Front Psychol. 2020;11:579038.

421. Ozamiz-Etxebarria N, Dosil-Santamaria M, Picaza-Gorrochategui M, Idoiaga-Mondragon N. Stress, anxiety, and depression levels in the initial stage of the COVID-19 outbreak in a population sample in the northern Spain. Cad Saude Publica. 2020;36(4):e00054020.

422. Ozamiz-Etxebarria N, Idoiaga Mondragon N, Dosil Santamaria M, Picaza Gorrotxategi M. Psychological Symptoms During the Two Stages of Lockdown in Response to the COVID-19 Outbreak: An Investigation in a Sample of Citizens in Northern Spain. Front Psychol. 2020;11:1491.

423. Özden G, Parlar Kiliç S. The Effect of Social Isolation during COVID-19 Pandemic on Nutrition and Exercise Behaviors of Nursing Students. Ecol Food Nutr. 2021:1-19.

424. Paital B, Das K, Parida SK. Inter nation social lockdown versus medical care against COVID-19, a mild environmental insight with special reference to India. Sci Total Environ. 2020;728:138914.

425. Pakravan-Charvadeh MR, Savari M, Khan HA, Gholamrezai S, Flora C. Determinants of household vulnerability to food insecurity during COVID-19 lockdown in a mid-term period in Iran. Public Health Nutr. 2021:1-10.

426. Pal R, Yadav U, Verma A, Bhadada SK. Awareness regarding COVID-19 and problems being faced by young adults with type 1 diabetes mellitus amid nationwide lockdown in India: A qualitative interview study. Prim Care Diabetes. 2021;15(1):10-5.

427. Palacio-Ortiz JD, Londoño-Herrera JP, Nanclares-Márquez A, Robledo-Rengifo P, Quintero-Cadavid CP. Psychiatric disorders in children and adolescents during the COVID-19 pandemic. Rev Colomb Psiquiatr. 2020;49(4):279-88.

428. Palmer K, Monaco A, Kivipelto M, Onder G, Maggi S, Michel JP, et al. The potential long-term impact of the COVID-19 outbreak on patients with non-communicable diseases in Europe: consequences for healthy ageing. Aging Clin Exp Res. 2020;32(7):1189-94.

429. Panagiotidis P, Rantis K, Holeva V, Parlapani E, Diakogiannis I. Changes in Alcohol Use Habits in the General Population, during the COVID-19 Lockdown in Greece. Alcohol Alcohol. 2020;55(6):702-4.

430. Pandit PM, Bhatia G, Sarkar S. Treatment experience for opioid use disorder during COVID-19 in India: Learning from patients. J Subst Abuse Treat. 2020;119:108128.

431. Panno A, Carbone GA, Massullo C, Farina B, Imperatori C. COVID-19 Related Distress Is Associated With Alcohol Problems, Social Media and Food Addiction Symptoms: Insights From the Italian Experience During the Lockdown. Front Psychiatry. 2020;11:577135.

432. Papadopoulou A, Efstathiou V, Yotsidi V, Pomini V, Michopoulos I, Markopoulou E, et al. Suicidal ideation during COVID-19 lockdown in Greece: Prevalence in the community, risk and protective factors. Psychiatry Res. 2021;297:113713.

433. Park S, Kim B, Lee J. Social Distancing and Outdoor Physical Activity During the COVID-19 Outbreak in South Korea: Implications for Physical Distancing Strategies. Asia Pac J Public Health. 2020;32(6-7):360-2.

434. Passavanti M, Argentieri A, Barbieri DM, Lou B, Wijayaratna K, Foroutan Mirhosseini AS, et al. The psychological impact of COVID-19 and restrictive measures in the world. J Affect Disord. 2021;283:36-51.

435. Passos L, Prazeres F, Teixeira A, Martins C. Impact on Mental Health Due to COVID-19 Pandemic: Cross-Sectional Study in Portugal and Brazil. Int J Environ Res Public Health. 2020;17(18).

436. Patsali ME, Mousa DV, Papadopoulou EVK, Papadopoulou KKK, Kaparounaki CK, Diakogiannis I, et al. University students' changes in mental health status and determinants of behavior during the COVID-19 lockdown in Greece. Psychiatry Res. 2020;292:113298.

437. Patwardhan P, Driscoll R. 'Quit During COVID-19'-staying smokefree in mental health in-patient settings. Ecancermedicalscience. 2020;14:ed102.

438. Paz C, Mascialino G, Adana-Díaz L, Rodríguez-Lorenzana A, Simbaña-Rivera K, Gómez-Barreno L, et al. Behavioral and sociodemographic predictors of anxiety and depression in patients under epidemiological surveillance for COVID-19 in Ecuador. PLoS One. 2020;15(9):e0240008.

439. Pearl RL. Weight Stigma and the "Quarantine-15". Obesity (Silver Spring). 2020;28(7):1180-1.

440. Pecanha T, Goessler KF, Roschel H, Gualano B. Social isolation during the COVID-19 pandemic can increase physical inactivity and the global burden of cardiovascular disease. Am J Physiol Heart Circ Physiol. 2020;318(6):H1441-H6.

441. Pedreira Massa JL. [Mental Health and COVID-19 in children and adolescents: psychopathologycal and Public Health approach.]. Rev Esp Salud Publica. 2020;94.

442. Pellegrini M, Ponzo V, Rosato R, Scumaci E, Goitre I, Benso A, et al. Changes in Weight and Nutritional Habits in Adults with Obesity during the "Lockdown" Period Caused by the COVID-19 Virus Emergency. Nutrients. 2020;12(7).

443. Peng M, Mo B, Liu Y, Xu M, Song X, Liu L, et al. Prevalence, risk factors and clinical correlates of depression in quarantined population during the COVID-19 outbreak. J Affect Disord. 2020;275:119-24.

444. Pérez LM, Castellano-Tejedor C, Cesari M, Soto-Bagaria L, Ars J, Zambom-Ferraresi F, et al. Depressive Symptoms, Fatigue and Social Relationships Influenced Physical Activity in Frail Older Community-Dwellers during the Spanish Lockdown due to the COVID-19 Pandemic. Int J Environ Res Public Health. 2021;18(2).

445. Pérez-Carbonell L, Meurling IJ, Wassermann D, Gnoni V, Leschziner G, Weighall A, et al. Impact of the novel coronavirus (COVID-19) pandemic on sleep. J Thorac Dis. 2020;12(Suppl 2):S163-s75.

446. Perez-Fuentes MDC, Molero Jurado MDM, Martos Martinez A, Gazquez Linares JJ. Threat of COVID-19 and emotional state during quarantine: Positive and negative affect as mediators in a cross-sectional study of the Spanish population. PLoS One. 2020;15(6):e0235305.

447. Perez-Rodrigo C, Gianzo Citores M, Hervas Barbara G, Ruiz-Litago F, Casis Saenz L, Arija V, et al. Patterns of Change in Dietary Habits and Physical Activity during Lockdown in Spain Due to the COVID-19 Pandemic. Nutrients. 2021;13(2).

448. Pfefferbaum B, North CS. Mental Health and the Covid-19 Pandemic. N Engl J Med. 2020;383(6):510-2.

449. Pham KM, Pham LV, Phan DT, Tran TV, Nguyen HC, Nguyen MH, et al. Healthy Dietary Intake Behavior Potentially Modifies the Negative Effect of COVID-19 Lockdown on Depression: A Hospital and Health Center Survey. Front Nutr. 2020;7:581043.

450. Philip KEJ, Polkey MI, Hopkinson NS, Steptoe A, Fancourt D. Social isolation, loneliness and physical performance in older-adults: fixed effects analyses of a cohort study. Sci Rep. 2020;10(1):13908.

451. Philippe K, Chabanet C, Issanchou S, Monnery-Patris S. Child eating behaviors, parental feeding practices and food shopping motivations during the COVID-19 lockdown in France: (How) did they change? Appetite. 2021;161:105132.

452. Phillipou A, Meyer D, Neill E, Tan EJ, Toh WL, Van Rheenen TE, et al. Eating and exercise behaviors in eating disorders and the general population during the COVID-19 pandemic in Australia: Initial results from the COLLATE project. Int J Eat Disord. 2020;53(7):1158-65.

453. Piano C, Bove F, Tufo T, Imbimbo I, Genovese D, Stefani A, et al. Effects of COVID-19 Lockdown on Movement Disorders Patients With Deep Brain Stimulation: A Multicenter Survey. Front Neurol. 2020;11:616550.

454. Pieh C, Budimir S, Delgadillo J, Barkham M, Fontaine JRJ, Probst T. Mental health during COVID-19 lockdown in the United Kingdom. Psychosom Med. 2020.

455. Pieh C, Budimir S, Probst T. The effect of age, gender, income, work, and physical activity on mental health during coronavirus disease (COVID-19) lockdown in Austria. J Psychosom Res. 2020;136:110186.

456. Pieh C, T OR, Budimir S, Probst T. Relationship quality and mental health during COVID-19 lockdown. PLoS One. 2020;15(9):e0238906.

457. Pietrobelli A, Pecoraro L, Ferruzzi A, Heo M, Faith M, Zoller T, et al. Effects of COVID-19 Lockdown on Lifestyle Behaviors in Children with Obesity Living in Verona, Italy: A Longitudinal Study. Obesity (Silver Spring). 2020;28(8):1382-5.

458. Pigaiani Y, Zoccante L, Zocca A, Arzenton A, Menegolli M, Fadel S, et al. Adolescent Lifestyle Behaviors, Coping Strategies and Subjective Wellbeing during the COVID-19 Pandemic: An Online Student Survey. Healthcare (Basel). 2020;8(4).

459. Pinto AJ, Dunstan DW, Owen N, Bonfa E, Gualano B. Combating physical inactivity during the COVID-19 pandemic. Nat Rev Rheumatol. 2020;16(7):347-8.

460. Pinto J, van Zeller M, Amorim P, Pimentel A, Dantas P, Eusebio E, et al. Sleep quality in times of Covid-19 pandemic. Sleep Med. 2020;74:81-5.

461. Planchuelo-Gomez A, Odriozola-Gonzalez P, Irurtia MJ, de Luis-Garcia R. Longitudinal evaluation of the psychological impact of the COVID-19 crisis in Spain. J Affect Disord. 2020;277:842-9.

462. Poe GR, Cai DJ. The lab on lockdown: thinking back and looking ahead. Nat Rev Neurosci. 2020;21(9):447-8.

463. Prati G. Mental health and its psychosocial predictors during national quarantine in Italy against the coronavirus disease 2019 (COVID-19). Anxiety Stress Coping. 2021;34(2):145-56.

464. Probst T, Budimir S, Pieh C. Depression in and after COVID-19 lockdown in Austria and the role of stress and loneliness in lockdown: A longitudinal study. J Affect Disord. 2020;277:962-3.

465. Puccinelli PJ, Costa TS, Seffrin A, de Lira CAB, Vancini RL, Knechtle B, et al. Physical Activity Levels and Mental Health during the COVID-19 Pandemic: Preliminary Results of a Comparative Study between Convenience Samples from Brazil and Switzerland. Medicina (Kaunas). 2021;57(1).

466. Radtke T, Haile SR, Dressel H, Benden C. Recommended shielding against COVID-19 impacts physical activity levels in adults with cystic fibrosis. J Cyst Fibros. 2020;19(6):875-9.

467. Ranasinghe C, Ozemek C, Arena R. Exercise and well-being during COVID 19 - time to boost your immunity. Expert Rev Anti Infect Ther. 2020;18(12):1195-200.

468. Rastogi A, Hiteshi P, Bhansali A. Improved glycemic control amongst people with long-standing diabetes during COVID-19 lockdown: a prospective, observational, nested cohort study. Int J Diabetes Dev Ctries. 2020:1-6.

469. Raude J, Lecrique JM, Lasbeur L, Leon C, Guignard R, du Roscoät E, et al. Determinants of Preventive Behaviors in Response to the COVID-19 Pandemic in France: Comparing the Sociocultural, Psychosocial, and Social Cognitive Explanations. Front Psychol. 2020;11:584500.

470. Rehman U, Shahnawaz MG, Khan NH, Kharshiing KD, Khursheed M, Gupta K, et al. Depression, Anxiety and Stress Among Indians in Times of Covid-19 Lockdown. Community Ment Health J. 2021;57(1):42-8.

471. Rettie H, Daniels J. Coping and tolerance of uncertainty: Predictors and mediators of mental health during the COVID-19 pandemic. Am Psychol. 2020.

472. Reuter H, Jenkins LS, De Jong M, Reid S, Vonk M. Prohibiting alcohol sales during the coronavirus disease 2019 pandemic has positive effects on health services in South Africa. Afr J Prim Health Care Fam Med. 2020;12(1):e1-e4.

473. Rezende LFM, Lee DH, Ferrari G, Eluf-Neto J, Giovannucci EL. Physical activity for cancer patients during COVID-19 pandemic: a call to action. Cancer Causes Control. 2021;32(1):1-3.

474. Ricci F, Izzicupo P, Moscucci F, Sciomer S, Maffei S, Di Baldassarre A, et al. Recommendations for Physical Inactivity and Sedentary Behavior During the Coronavirus Disease (COVID-19) Pandemic. Front Public Health. 2020;8:199.

475. Richardson DL, Duncan MJ, Clarke ND, Myers TD, Tallis J. The influence of COVID-19 measures in the United Kingdom on physical activity levels, perceived physical function and mood in older adults: A survey-based observational study. J Sports Sci. 2020:1-13.

476. Rimmer A. Covid-19: RCGP apologises for covid-19 "lifestyle" event title. BMJ. 2020;369:m2623.

477. Ripon RK, Mim SS, Puente AE, Hossain S, Babor MMH, Sohan SA, et al. COVID-19: psychological effects on a COVID-19 quarantined population in Bangladesh. Heliyon. 2020;6(11):e05481.

478. Robb CE, de Jager CA, Ahmadi-Abhari S, Giannakopoulou P, Udeh-Momoh C, McKeand J, et al. Associations of Social Isolation with Anxiety and Depression During the Early COVID-19 Pandemic: A Survey of Older Adults in London, UK. Front Psychiatry. 2020;11:591120.

479. Robertson M, Duffy F, Newman E, Prieto Bravo C, Ates HH, Sharpe H. Exploring changes in body image, eating and exercise during the COVID-19 lockdown: A UK survey. Appetite. 2021;159:105062.

480. Robinson E, Boyland E, Chisholm A, Harrold J, Maloney NG, Marty L, et al. Obesity, eating behavior and physical activity during COVID-19 lockdown: A study of UK adults. Appetite. 2021;156:104853.

481. Robinson E, Daly M. Explaining the rise and fall of psychological distress during the COVID-19 crisis in the United States: Longitudinal evidence from the Understanding America Study. Br J Health Psychol. 2020.

482. Rodgers RF, Lombardo C, Cerolini S, Franko DL, Omori M, Fuller-Tyszkiewicz M, et al. The impact of the COVID-19 pandemic on eating disorder risk and symptoms. Int J Eat Disord. 2020;53(7):1166-70.

483. Rodriguez MA, Crespo I, Olmedillas H. Exercising in times of COVID-19: what do experts recommend doing within four walls? Rev Esp Cardiol (Engl Ed). 2020;73(7):527-9.

484. Rodriguez-Nunez I. [Dosing physical exercise intensity during the COVlD-19 quarantine: Does perceptual self-regulation work in children?]. Rev Chil Pediatr. 2020;91(2):304-5.

485. Rodriguez-Perez C, Molina-Montes E, Verardo V, Artacho R, Garcia-Villanova B, Guerra-Hernandez EJ, et al. Changes in Dietary Behaviours during the COVID-19 Outbreak Confinement in the Spanish COVIDiet Study. Nutrients. 2020;12(6).

486. Rodriguez-Seijas C, Fields EC, Bottary R, Kark SM, Goldstein MR, Kensinger EA, et al. Comparing the Impact of COVID-19-Related Social Distancing on Mood and Psychiatric Indicators in Sexual and Gender Minority (SGM) and Non-SGM Individuals. Front Psychiatry. 2020;11:590318.

487. Rogers AH, Shepherd JM, Garey L, Zvolensky MJ. Psychological factors associated with substance use initiation during the COVID-19 pandemic. Psychiatry Res. 2020;293:113407.

488. Rogers NT, Waterlow NR, Brindle H, Enria L, Eggo RM, Lees S, et al. Behavioral Change Towards Reduced Intensity Physical Activity Is Disproportionately Prevalent Among Adults With Serious Health Issues or Self-Perception of High Risk During the UK COVID-19 Lockdown. Front Public Health. 2020;8:575091.

489. Rogowska AM, Pavlova I, Kuśnierz C, Ochnik D, Bodnar I, Petrytsa P. Does Physical Activity Matter for the Mental Health of University Students during the COVID-19 Pandemic? J Clin Med. 2020;9(11).

490. Rohr S, Muller F, Jung F, Apfelbacher C, Seidler A, Riedel-Heller SG. [Psychosocial Impact of Quarantine Measures During Serious Coronavirus Outbreaks: A Rapid Review]. Psychiatr Prax. 2020;47(4):179-89.

491. Rolland B, Haesebaert F, Zante E, Benyamina A, Haesebaert J, Franck N. Global Changes and Factors of Increase in Caloric/Salty Food Intake, Screen Use, and Substance Use During the Early COVID-19 Containment Phase in the General Population in France: Survey Study. JMIR Public Health Surveill. 2020;6(3):e19630.

492. Romero-Blanco C, Rodriguez-Almagro J, Onieva-Zafra MD, Parra-Fernandez ML, Prado-Laguna MDC, Hernandez-Martinez A. Physical Activity and Sedentary Lifestyle in University Students: Changes during Confinement Due to the COVID-19 Pandemic. Int J Environ Res Public Health. 2020;17(18).

493. Romero-Blanco C, Rodriguez-Almagro J, Onieva-Zafra MD, Parra-Fernandez ML, Prado-Laguna MDC, Hernandez-Martinez A. Sleep Pattern Changes in Nursing Students during the COVID-19 Lockdown. Int J Environ Res Public Health. 2020;17(14).

494. Roschel H, Artioli GG, Gualano B. Risk of Increased Physical Inactivity During COVID-19 Outbreak in Older People: A Call for Actions. J Am Geriatr Soc. 2020;68(6):1126-8.

495. Rossi R, Socci V, Talevi D, Mensi S, Niolu C, Pacitti F, et al. COVID-19 Pandemic and Lockdown Measures Impact on Mental Health Among the General Population in Italy. Front Psychiatry. 2020;11:790.

496. Rossinot H, Fantin R, Venne J. Behavioral Changes During COVID-19 Confinement in France: A Web-Based Study. Int J Environ Res Public Health. 2020;17(22).

497. Routen A, Darko N, Willis A, Miksza J, Khunti K. The impact of Covid-19 and lockdown measures on self-reported life satisfaction and social relationships does not differ by ethnicity. J Public Health (Oxf). 2020.

498. Ruger JP. The injustice of COVID-19: we need a moral constitution for our planet's health. Lancet Planet Health. 2020;4(7):e264-e5.

499. Ruggieri S, Ingoglia S, Bonfanti RC, Lo Coco G. The role of online social comparison as a protective factor for psychological wellbeing: A longitudinal study during the COVID-19 quarantine. Pers Individ Dif. 2021;171:110486.

500. Ruissen MM, Regeer H, Landstra CP, Schroijen M, Jazet I, Nijhoff MF, et al. Increased stress, weight gain and less exercise in relation to glycemic control in people with type 1 and type 2 diabetes during the COVID-19 pandemic. BMJ Open Diabetes Research and Care. 2021;9(1):e002035.

501. Ruiz-Roso MB, de Carvalho Padilha P, Mantilla-Escalante DC, Ulloa N, Brun P, Acevedo-Correa D, et al. Covid-19 Confinement and Changes of Adolescent's Dietary Trends in Italy, Spain, Chile, Colombia and Brazil. Nutrients. 2020;12(6).

502. Ruiz-Roso MB, de Carvalho Padilha P, Matilla-Escalante DC, Brun P, Ulloa N, Acevedo-Correa D, et al. Changes of Physical Activity and Ultra-Processed Food Consumption in Adolescents from Different Countries during Covid-19 Pandemic: An Observational Study. Nutrients. 2020;12(8).

503. Ruiz-Roso MB, Knott-Torcal C, Matilla-Escalante DC, Garcimartin A, Sampedro-Nunez MA, Davalos A, et al. COVID-19 Lockdown and Changes of the Dietary Pattern and Physical Activity Habits in a Cohort of Patients with Type 2 Diabetes Mellitus. Nutrients. 2020;12(8).

504. Sacco MA, Caputo F, Ricci P, Sicilia F, De Aloe L, Bonetta CF, et al. The impact of the Covid-19 pandemic on domestic violence: The dark side of home isolation during quarantine. Med Leg J. 2020;88(2):71-3.

505. Salehinejad MA, Majidinezhad M, Ghanavati E, Kouestanian S, Vicario CM, Nitsche MA, et al. Negative impact of COVID-19 pandemic on sleep quantitative parameters, quality, and circadian alignment: Implications for health and psychological well-being. Excli j. 2020;19:1297-308.

506. Salman D, Beaney T, Robb CE, de Jager Loots CA, Giannakopoulou P, Udeh-Momoh C, et al. The impact of social restrictions during the COVID-19 pandemic on the physical activity levels of older adults: a baseline analysis of the CHARIOT COVID-19 Rapid Response prospective cohort study. medRxiv. 2021:2021.01.26.21250520.

507. Saltzman LY, Hansel TC, Bordnick PS. Loneliness, isolation, and social support factors in post-COVID-19 mental health. Psychol Trauma. 2020;12(S1):S55-S7.

508. Sama BK, Kaur P, Thind PS, Verma MK, Kaur M, Singh DD. Implications of COVID-19-induced nationwide lockdown on children's behaviour in Punjab, India. Child Care Health Dev. 2021;47(1):128-35.

509. Sandín B, Valiente RM, García-Escalera J, Campagne DM, Chorot P. Psychological impact of the COVID-19 pandemic: Negative and positive effects in Spanish population during the mandatory national quarantine. Journal of Psychopathology and Clinical Psychology/Revista de Psicopatología y Psicología Clínica. 2020;25(1):1-21.

510. Sankar P, Ahmed WN, Mariam Koshy V, Jacob R, Sasidharan S. Effects of COVID-19 lockdown on type 2 diabetes, lifestyle and psychosocial health: A hospital-based cross-sectional survey from South India. Diabetes Metab Syndr. 2020;14(6):1815-9.

511. Saqib MAN, Siddiqui S, Qasim M, Jamil MA, Rafique I, Awan UA, et al. Effect of COVID-19 lockdown on patients with chronic diseases. Diabetes Metab Syndr. 2020;14(6):1621-3.

512. Sarkar P, Debnath N, Reang D. Coupled human-environment system amid COVID-19 crisis: A conceptual model to understand the nexus. Sci Total Environ. 2021;753:141757.

513. Sasaki N, Kuroda R, Tsuno K, Kawakami N. The deterioration of mental health among healthcare workers during the COVID-19 outbreak: A population-based cohort study of workers in Japan. Scand J Work Environ Health. 2020;46(6):639-44.

514. Sassone B, Mandini S, Grazzi G, Mazzoni G, Myers J, Pasanisi G. Impact of COVID-19 Pandemic on Physical Activity in Patients With Implantable Cardioverter-Defibrillators. J Cardiopulm Rehabil Prev. 2020;40(5):285-6.

515. Satre DD, Iturralde E, Ghadiali M, Young-Wolff KC, Campbell CI, Leibowitz AS, et al. Treatment for Anxiety and Substance Use Disorders During the COVID-19 Pandemic: Challenges and Strategies. J Addict Med. 2020;14(6):e293-e6.

516. Scarmozzino F, Visioli F. Covid-19 and the Subsequent Lockdown Modified Dietary Habits of Almost Half the Population in an Italian Sample. Foods. 2020;9(5).

517. Schlichtiger J, Steffen J, Huber BC, Brunner S. Physical activity during COVID-19 lockdown in older adults. J Sports Med Phys Fitness. 2021;61(1):164-6.

518. Schmidt SCE, Anedda B, Burchartz A, Eichsteller A, Kolb S, Nigg C, et al. Physical activity and screen time of children and adolescents before and during the COVID-19 lockdown in Germany: a natural experiment. Sci Rep. 2020;10(1):21780.

519. Schmits E, Glowacz F. Changes in Alcohol Use During the COVID-19 Pandemic: Impact of the Lockdown Conditions and Mental Health Factors. Int J Ment Health Addict. 2021:1-12.

520. Schuch FB, Bulzing RA, Meyer J, Vancampfort D, Firth J, Stubbs B, et al. Associations of moderate to vigorous physical activity and sedentary behavior with depressive and anxiety symptoms in self-isolating people during the COVID-19 pandemic: A cross-sectional survey in Brazil. Psychiatry Res. 2020;292:113339.

521. Schwinger M, Trautner M, Kärchner H, Otterpohl N. Psychological Impact of Corona Lockdown in Germany: Changes in Need Satisfaction, Well-Being, Anxiety, and Depression. Int J Environ Res Public Health. 2020;17(23).

522. Sediri S, Zgueb Y, Ouanes S, Ouali U, Bourgou S, Jomli R, et al. Women's mental health: acute impact of COVID-19 pandemic on domestic violence. Arch Womens Ment Health. 2020;23(6):749-56.

523. Sehgal V, Kalra A, Singh S, Ulmer B. Sex, Sleep, Steroids, and Lifestyle: Unraveling the Coronavirus Disease 2019 Conundrum. J Transl Int Med. 2020;8(3):131-4.

524. Serafini G, Parmigiani B, Amerio A, Aguglia A, Sher L, Amore M. The psychological impact of COVID-19 on the mental health in the general population. QJM. 2020;113(8):531-7.

525. Serralta FB, Zibetti MR, Evans C. Psychological Distress of University Workers during COVID-19 Pandemic in Brazil. Int J Environ Res Public Health. 2020;17(22).

526. Sfendla A, Hadrya F. Factors Associated with Psychological Distress and Physical Activity During the COVID-19 Pandemic. Health Secur. 2020;18(6):444-53.

527. Shader RI. COVID-19 and Depression. Clin Ther. 2020;42(6):962-3.

528. Shah SMA, Mohammad D, Qureshi MFH, Abbas MZ, Aleem S. Prevalence, Psychological Responses and Associated Correlates of Depression, Anxiety and Stress in a Global Population, During the Coronavirus Disease (COVID-19) Pandemic. Community Ment Health J. 2021;57(1):101-10.

529. Shahidi SH, Stewart Williams J, Hassani F. Physical activity during COVID-19 quarantine. Acta Paediatr. 2020;109(10):2147-8.

530. Shammi M, Bodrud-Doza M, Towfiqul Islam ARM, Rahman MM. COVID-19 pandemic, socioeconomic crisis and human stress in resource-limited settings: A case from Bangladesh. Heliyon. 2020;6(5):e04063.

531. Shanahan L, Steinhoff A, Bechtiger L, Murray AL, Nivette A, Hepp U, et al. Emotional distress in young adults during the COVID-19 pandemic: evidence of risk and resilience from a longitudinal cohort study. Psychol Med. 2020:1-10.

532. Shariat A, Cleland JA, Hakakzadeh A. Home-based exercises during the COVID-19 quarantine situation for office workers: A commentary. Work. 2020;66(2):381-2.

533. Sharma K, Anand A, Kumar R. The role of Yoga in working from home during the COVID-19 global lockdown. Work. 2020;66(4):731-7.

534. Shaw H, Robertson S, Ranceva N. What was the impact of a global pandemic (COVID-19) lockdown period on experiences within an eating disorder service? A service evaluation of the views of patients, parents/carers and staff. J Eat Disord. 2021;9(1):14.

535. Sheffler JL, Joiner TE, Sachs-Ericsson NJ. The Interpersonal and Psychological Impacts of COVID-19 on Risk for Late-Life Suicide. Gerontologist. 2021;61(1):23-9.

536. Sher L. The impact of the COVID-19 pandemic on suicide rates. QJM. 2020;113(10):707-12.

537. Shinohara T, Saida K, Tanaka S, Murayama A. Association between frailty and changes in lifestyle and physical or psychological conditions among older adults affected by the coronavirus disease 2019 countermeasures in Japan. Geriatr Gerontol Int. 2021;21(1):39-42.

538. Shrira A, Hoffman Y, Bodner E, Palgi Y. COVID-19-Related Loneliness and Psychiatric Symptoms Among Older Adults: The Buffering Role of Subjective Age. Am J Geriatr Psychiatry. 2020;28(11):1200-4.

539. Sibley D, Abdalla H, Gupta A, Ho J. Exercise in isolating during novel coronavirus 19: a case report of bilateral ocular trauma from elastic resistant bands. Can J Ophthalmol. 2020;55(6):e209-e11.

540. Sidor A, Rzymski P. Dietary Choices and Habits during COVID-19 Lockdown: Experience from Poland. Nutrients. 2020;12(6).

541. Silczuk A. Threatening increase in alcohol consumption in physicians quarantined due to coronavirus outbreak in Poland: the ALCOVID survey. J Public Health (Oxf). 2020;42(3):461-5.

542. Silva E, Ono B, Souza JC. Sleep and immunity in times of COVID-19. Rev Assoc Med Bras (1992). 2020;66Suppl 2(Suppl 2):143-7.

543. Silva LRB, Seguro CS, de Oliveira CGA, Santos POS, de Oliveira JCM, de Souza Filho LFM, et al. Physical Inactivity Is Associated With Increased Levels of Anxiety, Depression, and Stress in Brazilians During the COVID-19 Pandemic: A Cross-Sectional Study. Front Psychiatry. 2020;11:565291.

544. Simpson RJ, Katsanis E. The immunological case for staying active during the COVID-19 pandemic. Brain Behav Immun. 2020;87:6-7.

545. Singh S, Roy D, Sinha K, Parveen S, Sharma G, Joshi G. Impact of COVID-19 and lockdown on mental health of children and adolescents: A narrative review with recommendations. Psychiatry Res. 2020;293:113429.

546. Singh S, Sharma P, Balhara YPS. The impact of nationwide alcohol ban during the COVID-19 lockdown on alcohol use-related internet searches and behaviour in India: An infodemiology study. Drug Alcohol Rev. 2020.

547. Singh SP, Khokhar A. Prevalence of Posttraumatic Stress Disorder and Depression in General Population in India During COVID-19 Pandemic Home Quarantine. Asia Pac J Public Health. 2020:1010539520968455.

548. Sinha M, Pande B, Sinha R. Impact of COVID-19 lockdown on sleep-wake schedule and associated lifestyle related behavior: A national survey. J Public Health Res. 2020;9(3):1826.

549. Sinha M, Pande B, Sinha R. Association of mid sleep time and social jetlag with psychosocial behaviour of Indian population during COVID-19 lockdown. J Public Health Res. 2020;9(4):1870.

550. Sinisterra Loaiza LI, Vázquez Belda B, Miranda López JM, Cepeda A, Cardelle Cobas A. [Food habits in the Galician population during confinement byCOVID-19]. Nutr Hosp. 2020;37(6):1190-6.

551. Smirni P, Lavanco G, Smirni D. Anxiety in Older Adolescents at the Time of COVID-19. J Clin Med. 2020;9(10).

552. Smith BJ, Lim MH. How the COVID-19 pandemic is focusing attention on loneliness and social isolation. Public Health Res Pract. 2020;30(2).

553. Snuggs S, McGregor S. Food & meal decision making in lockdown: How and who has Covid-19 affected? Food Qual Prefer. 2021;89:104145.

554. Somma A, Krueger RF, Markon KE, Gialdi G, Colanino M, Ferlito D, et al. A longitudinal study on clinically relevant self-reported depression, anxiety and acute stress features among Italian community-dwelling adults during the COVID-19 related lockdown: Evidence of a predictive role for baseline dysfunctional personality dimensions. J Affect Disord. 2021;282:364-71.

555. Sommerlad A, Marston L, Huntley J, Livingston G, Lewis G, Steptoe A, et al. Social relationships and depression during the COVID-19 lockdown: longitudinal analysis of the COVID-19 Social Study. Psychol Med. 2021:1-10.

556. Song M. Psychological stress responses to COVID-19 and adaptive strategies in China. World Dev. 2020;136:105107.

557. Spagnolo PA, Montemitro C, Leggio L. New Challenges in Addiction Medicine: COVID-19 Infection in Patients With Alcohol and Substance Use Disorders-The Perfect Storm. Am J Psychiatry. 2020;177(9):805-7.

558. Spence JC, Rhodes RE, McCurdy A, Mangan A, Hopkins D, Mummery WK. Determinants of physical activity among adults in the United Kingdom during the COVID-19 pandemic: The DUK-COVID study. Br J Health Psychol. 2020.

559. Spinelli M, Lionetti F, Pastore M, Fasolo M. Parents' Stress and Children's Psychological Problems in Families Facing the COVID-19 Outbreak in Italy. Front Psychol. 2020;11:1713.

560. Srivastav AK, Sharma N, Samuel AJ. Impact of Coronavirus disease-19 (COVID-19) lockdown on physical activity and energy expenditure among physiotherapy professionals and students using web-based open E-survey sent through WhatsApp, Facebook and Instagram messengers. Clin Epidemiol Glob Health. 2021;9:78-84.

561. Sugaya N, Yamamoto T, Suzuki N, Uchiumi C. A real-time survey on the psychological impact of mild lockdown for COVID-19 in the Japanese population. Sci Data. 2020;7(1):372.

562. Sun S, Lin D, Operario D. Need for a population health approach to understand and address psychosocial consequences of COVID-19. Psychol Trauma. 2020;12(S1):S25-S7.

563. Sun Y, Li Y, Bao Y, Meng S, Sun Y, Schumann G, et al. Brief Report: Increased Addictive Internet and Substance Use Behavior During the COVID-19 Pandemic in China. Am J Addict. 2020;29(4):268-70.

564. Syed NK, Griffiths MD. Nationwide suicides due to alcohol withdrawal symptoms during COVID-19 pandemic: A review of cases from media reports. J Psychiatr Res. 2020;130:289-91.

565. Szabó C, Pukánszky J, Kemény L. Psychological Effects of the COVID-19 Pandemic on Hungarian Adults. Int J Environ Res Public Health. 2020;17(24).

566. Szajnoga D, Klimek-Tulwin M, Piekut A. COVID-19 lockdown leads to changes in alcohol consumption patterns. Results from the Polish national survey. J Addict Dis. 2020:1-12.

567. Szczepańska A, Pietrzyka K. The COVID-19 epidemic in Poland and its influence on the quality of life of university students (young adults) in the context of restricted access to public spaces. Z Gesundh Wiss. 2021:1-11.

568. Szkody E, Stearns M, Stanhope L, McKinney C. Stress-Buffering Role of Social Support during COVID-19. Fam Process. 2020.

569. Taeymans J, Luijckx E, Rogan S, Haas K, Baur H. Physical Activity, Nutritional Habits and Sleeping Behavior in Health Professions Students and Employees of a Swiss University of Applied Sciences During the COVID-19 Lockdown Period: a Questionnaire Survey Study. JMIR Public Health and Surveillance. 2021.

570. Tang W, Hu T, Hu B, Jin C, Wang G, Xie C, et al. Prevalence and correlates of PTSD and depressive symptoms one month after the outbreak of the COVID-19 epidemic in a sample of home-quarantined Chinese university students. J Affect Disord. 2020;274:1-7.

571. Tao J, Gao L, Liu Q, Dong K, Huang J, Peng X, et al. Factors contributing to glycemic control in diabetes mellitus patients complying with home quarantine during the coronavirus disease 2019 (COVID-19) epidemic. Diabetes Res Clin Pract. 2020;170:108514.

572. Taylor S, Landry CA, Paluszek MM, Fergus TA, McKay D, Asmundson GJG. COVID stress syndrome: Concept, structure, and correlates. Depress Anxiety. 2020;37(8):706-14.

573. Team AR, Milken Research T, Roitblat Y, Burger J, Leit A, Nehuliaieva L, et al. Stay-at-home circumstances do not produce sleep disorders: An international survey during the COVID-19 pandemic. J Psychosom Res. 2020;139:110282.

574. Tee ML, Tee CA, Anlacan JP, Aligam KJG, Reyes PWC, Kuruchittham V, et al. Psychological impact of COVID-19 pandemic in the Philippines. J Affect Disord. 2020;277:379-91.

575. Thapa SB, Mainali A, Schwank SE, Acharya G. Maternal mental health in the time of the COVID-19 pandemic. Acta Obstet Gynecol Scand. 2020;99(7):817-8.

576. The Lancet Gastroenterology H. Drinking alone: COVID-19, lockdown, and alcohol-related harm. Lancet Gastroenterol Hepatol. 2020;5(7):625.

577. Theis N, Campbell N, De Leeuw J, Owen M, Schenke KC. The effects of COVID-19 restrictions on physical activity and mental health of children and young adults with physical and/or intellectual disabilities. Disabil Health J. 2021:101064.

578. Thomson B. The COVID-19 Pandemic: A Global Natural Experiment. Circulation. 2020;142(1):14-6.

579. To QG, Duncan MJ, Van Itallie A, Vandelanotte C. Impact of COVID-19 on Physical Activity Among 10,000 Steps Members and Engagement With the Program in Australia: Prospective Study. J Med Internet Res. 2021;23(1):e23946.

580. Tobias A. Evaluation of the lockdowns for the SARS-CoV-2 epidemic in Italy and Spain after one month follow up. Sci Total Environ. 2020;725:138539.

581. Tommasi M, Toro F, Arnò S, Carrieri A, Conte MM, Devastato MD, et al. Physical and Psychological Impact of the Phase One Lockdown for COVID-19 on Italians. Front Psychol. 2020;11:563722.

582. Toquero CMD, Talidong KJB. Socio-educational implications of technology use during COVID-19: A case study in General Santos City, Philippines. Hum Behav Emerg Technol. 2020.

583. Tornaghi M, Lovecchio N, Vandoni M, Chirico A, Codella R. Physical activity levels across COVID-19 outbreak in youngsters of Northwestern Lombardy. J Sports Med Phys Fitness. 2020.

584. Tso IF, Park S. Alarming levels of psychiatric symptoms and the role of loneliness during the COVID-19 epidemic: A case study of Hong Kong. Psychiatry Res. 2020;293:113423.

585. Twenge JM, Joiner TE. Mental distress among U.S. adults during the COVID-19 pandemic. J Clin Psychol. 2020;76(12):2170-82.

586. Uggioni PL, ELPO CMF, GERALDO APG, Fernandes AC, Mazzonetto AC, Bernardo GL. Cooking skills during the Covid-19 pandemic. Revista de Nutrição. 2020;33.

587. Valadez MdlD, Rodríguez-Naveiras E, Castellanos-Simons D, López-Aymes G, Aguirre T, Flores JF, et al. Physical activity and well-being of high ability students and community samples during the COVID-19 health alert. Frontiers in Psychology. 2020;11:3420.

588. Valenzuela PL, Santos-Lozano A, Lista S, Serra-Rexach JA, Emanuele E, Lucia A. Coronavirus Lockdown: Forced Inactivity for the Oldest Old? J Am Med Dir Assoc. 2020;21(7):988-9.

589. Valero Alzaga E, Martin Roncero U, Dominguez-Rodriguez A. [Covid-19 and child health: confinement and its impact according to child professionals.]. Rev Esp Salud Publica. 2020;94.

590. van Laar MW, Oomen PE, van Miltenburg CJA, Vercoulen E, Freeman TP, Hall WD. Cannabis and COVID-19: Reasons for Concern. Front Psychiatry. 2020;11:601653.

591. van Zanten J, Fenton SAM, Brady S, Metsios GS, Duda JL, Kitas GD. Mental Health and Psychological Wellbeing in Rheumatoid Arthritis during COVID-19 - Can Physical Activity Help? Mediterr J Rheumatol. 2020;31(Suppl 2):284-7.

592. Vancini RL, Camargo-Neto L, de Lira CAB, Andrade MS, Viana RB, Nikolaidis PT, et al. Physical Activity and Sociodemographic Profile of Brazilian People during COVID-19 Outbreak: An Online and Cross-Sectional Survey. Int J Environ Res Public Health. 2020;17(21).

593. Varma RP. Alcohol withdrawal management during the Covid-19 lockdown in Kerala. Indian J Med Ethics. 2020;V(2):105-6.

594. Vasiliadis AV, Boka V. "Run distancing" in the era of COVID-19 pandemic. J Sports Med Phys Fitness. 2020;60(5):806-7.

595. Vasylyeva TI, Smyrnov P, Strathdee S, Friedman SR. Challenges posed by COVID-19 to people who inject drugs and lessons from other outbreaks. J Int AIDS Soc. 2020;23(7):e25583.

596. Vázquez-Nava F, Vazquez-Rodriguez EM, Vazquez-Rodriguez CF, Betancourt NVO, Ruiz OC, Rodríguez-Castillejos GC. Risk factors of non-adherence to guidelines for the prevention of COVID-19 among young adults with asthma in a region with a high risk of a COVID-19 outbreak. J Asthma. 2020:1-7.

597. Vazquez-Vazquez A, Dib S, Rougeaux E, Wells JC, Fewtrell MS. The impact of the Covid-19 lockdown on the experiences and feeding practices of new mothers in the UK: Preliminary data from the COVID-19 New Mum Study. Appetite. 2021;156:104985.

598. Vera-Ponce VJ, Torres-Malca JR, Tello-Quispe EK, Orihuela-Manrique EJ, Cruz-Vargas JADL. Validación de escala de cambios en los estilos de vida durante el periodo de cuarentena en una población de estudiantes universitarios de Lima, Perú. Revista de la Facultad de Medicina Humana. 2020;20:614-23.

599. Verhagen IE, van Casteren DS, de Vries Lentsch S, Terwindt GM. Effect of lockdown during COVID-19 on migraine: A longitudinal cohort study. Cephalalgia. 2021:333102420981739.

600. Verma K. The mental health impact of the COVID-19 epidemic on college students in India. Asian J Psychiatr. 2020;53:102398.

601. Verma S, Mishra A. Depression, anxiety, and stress and socio-demographic correlates among general Indian public during COVID-19. Int J Soc Psychiatry. 2020;66(8):756-62.

602. Vetrovsky T, Frybova T, Gant I, Semerad M, Cimler R, Bunc V, et al. The detrimental effect of COVID-19 nationwide quarantine on accelerometer-assessed physical activity of heart failure patients. ESC Heart Fail. 2020;7(5):2093-7.

603. Viana RB, de Lira CAB. Exergames as Coping Strategies for Anxiety Disorders During the COVID-19 Quarantine Period. Games Health J. 2020;9(3):147-9.

604. Vieira PR, Garcia LP, Maciel ELN. [The increase in domestic violence during the social isolation: what does it reveals?]. Rev Bras Epidemiol. 2020;23:e200033.

605. Violant-Holz V, Gallego-Jiménez MG, González-González CS, Muñoz-Violant S, Rodríguez MJ, Sansano-Nadal O, et al. Psychological Health and Physical Activity Levels during the COVID-19 Pandemic: A Systematic Review. Int J Environ Res Public Health. 2020;17(24).

606. Voglino G, Gualano M, Lo Moro G, Bert F, Siliquini R. Effects of Covid-19 lockdown on mental health and sleep disturbances, results from an Italian survey. European Journal of Public Health. 2020;30(Supplement_5):ckaa165. 568.

607. Voitsidis P, Gliatas I, Bairachtari V, Papadopoulou K, Papageorgiou G, Parlapani E, et al. Insomnia during the COVID-19 pandemic in a Greek population. Psychiatry Res. 2020;289:113076.

608. Wang G, Zhang Y, Zhao J, Zhang J, Jiang F. Mitigate the effects of home confinement on children during the COVID-19 outbreak. Lancet. 2020;395(10228):945-7.

609. Wang S, Liu Y, Hu T. Examining the Change of Human Mobility Adherent to Social Restriction Policies and Its Effect on COVID-19 Cases in Australia. Int J Environ Res Public Health. 2020;17(21).

610. Wang S, Zhang Y, Ding W, Meng Y, Hu H, Liu Z, et al. Psychological distress and sleep problems when people are under interpersonal isolation during an epidemic: A nationwide multicenter cross-sectional study. Eur Psychiatry. 2020;63(1):e77.

611. Wang Y, Shi L, Que J, Lu Q, Liu L, Lu Z, et al. The impact of quarantine on mental health status among general population in China during the COVID-19 pandemic. Mol psychiatry. 2021.

612. Weaver RH, Jackson A, Lanigan J, Power TG, Anderson A, Cox AE, et al. Health Behaviors at the Onset of the COVID-19 Pandemic. Am J Health Behav. 2021;45(1):44-61.

613. Werneck AO, Silva DR, Malta DC, Souza-Júnior PRB, Azevedo LO, Barros MBA, et al. Physical inactivity and elevated TV-viewing reported changes during the COVID-19 pandemic are associated with mental health: A survey with 43,995 Brazilian adults. J Psychosom Res. 2021;140:110292.

614. Werneck AO, Silva DRD, Malta DC, Souza-Júnior PRB, Azevedo LO, Barros MBA, et al. Lifestyle behaviors changes during the COVID-19 pandemic quarantine among 6,881 Brazilian adults with depression and 35,143 without depression. Cien Saude Colet. 2020;25(suppl 2):4151-6.

615. White HR, Stevens AK, Hayes K, Jackson KM. Changes in Alcohol Consumption Among College Students Due to COVID-19: Effects of Campus Closure and Residential Change. J Stud Alcohol Drugs. 2020;81(6):725-30.

616. Whitehead BR, Torossian E. Older Adults' Experience of the COVID-19 Pandemic: A Mixed-Methods Analysis of Stresses and Joys. Gerontologist. 2021;61(1):36-47.

617. Whitley E, Reeve K, Benzeval M. Tracking the mental health of home-carers during the first COVID-19 national lockdown: evidence from a nationally representative UK survey. medRxiv. 2021:2021.01.25.21250437.

618. Wieland T. A phenomenological approach to assessing the effectiveness of COVID-19 related nonpharmaceutical interventions in Germany. Saf Sci. 2020;131:104924.

619. Wong AY, Ling SK, Louie LH, Law GY, So RC, Lee DC, et al. Impact of the COVID-19 pandemic on sports and exercise. Asia Pac J Sports Med Arthrosc Rehabil Technol. 2020;22:39-44.

620. Wu L, Guo X, Shang Z, Sun Z, Jia Y, Sun L, et al. China experience from COVID-19: Mental health in mandatory quarantine zones urgently requires intervention. Psychol Trauma. 2020;12(S1):S3-S5.

621. Xiang MQ, Tan XM, Sun J, Yang HY, Zhao XP, Liu L, et al. Relationship of Physical Activity With Anxiety and Depression Symptoms in Chinese College Students During the COVID-19 Outbreak. Front Psychol. 2020;11:582436.

622. Xiao H, Zhang Y, Kong D, Li S, Yang N. Social Capital and Sleep Quality in Individuals Who Self-Isolated for 14 Days During the Coronavirus Disease 2019 (COVID-19) Outbreak in January 2020 in China. Med Sci Monit. 2020;26:e923921.

623. Xiao S, Yan Z, Zhao L. Physical Activity, Screen Time, and Mood Disturbance Among Chinese Adolescents During COVID-19. J Psychosoc Nurs Ment Health Serv. 2020:1-7.

624. Xing LQ, Xu ML, Sun J, Wang QX, Ge DD, Jiang MM, et al. Anxiety and depression in frontline health care workers during the outbreak of Covid-19. Int J Soc Psychiatry. 2020:20764020968119.

625. Xue Z, Lin L, Zhang S, Gong J, Liu J, Lu J. Sleep problems and medical isolation during the SARS-CoV-2 outbreak. Sleep Med. 2020;70:112-5.

626. Yach D. Tobacco Use Patterns in Five Countries During the COVID-19 Lockdown. Nicotine Tob Res. 2020;22(9):1671-2.

627. Yadav SR, Kumar R, Kumar A, Ish P, Gupta N, Chakrabarti S. Sleepless in COVID-19: how not to lose sleep in lockdowns. Monaldi Arch Chest Dis. 2020;90(2).

628. Yamamoto T, Uchiumi C, Suzuki N, Yoshimoto J, Murillo-Rodriguez E. The Psychological Impact of 'Mild Lockdown' in Japan during the COVID-19 Pandemic: A Nationwide Survey under a Declared State of Emergency. Int J Environ Res Public Health. 2020;17(24).

629. Yang S, Guo B, Ao L, Yang C, Zhang L, Zhou J, et al. Obesity and activity patterns before and during COVID-19 lockdown among youths in China. Clin Obes. 2020;10(6):e12416.

630. Yang Y, Koenigstorfer J. Determinants of physical activity maintenance during the Covid-19 pandemic: a focus on fitness apps. Transl Behav Med. 2020;10(4):835-42.

631. Yang YC, Chou CL, Kao CL. Exercise, nutrition, and medication considerations in the light of the COVID pandemic, with specific focus on geriatric population: A literature review. J Chin Med Assoc. 2020;83(11):977-80.

632. Yildirim H, Işik K, Aylaz R. The effect of anxiety levels of elderly people in quarantine on depression during covid-19 pandemic. Social Work in Public Health. 2021:1-11.

633. Yocum AK, Zhai Y, McInnis MG, Han P. Covid-19 pandemic and lockdown impacts: A description in a longitudinal study of bipolar disorder. Journal of Affective Disorders. 2021;282:1226-33.

634. Yousfi N, Bragazzi NL, Briki W, Zmijewski P, Chamari K. The COVID-19 pandemic: how to maintain a healthy immune system during the lockdown - a multidisciplinary approach with special focus on athletes. Biol Sport. 2020;37(3):211-6.

635. Yuan S, Liao Z, Huang H, Jiang B, Zhang X, Wang Y, et al. Comparison of the Indicators of Psychological Stress in the Population of Hubei Province and Non-Endemic Provinces in China During Two Weeks During the Coronavirus Disease 2019 (COVID-19) Outbreak in February 2020. Med Sci Monit. 2020;26:e923767.

636. Yuksel D, McKee GB, Perrin PB, Alzueta E, Caffarra S, Ramos-Usuga D, et al. Sleeping when the world locks down: Correlates of sleep health during the COVID-19 pandemic across 59 countries. Sleep Health. 2021.

637. Yusuf E, Tisler A. The mortality and psychological burden caused by response to COVID-19 outbreak. Med Hypotheses. 2020;143:110069.

638. Zachary Z, Brianna F, Brianna L, Garrett P, Jade W, Alyssa D, et al. Self-quarantine and weight gain related risk factors during the COVID-19 pandemic. Obes Res Clin Pract. 2020;14(3):210-6.

639. Zemrani B, Gehri M, Masserey E, Knob C, Pellaton R. A hidden side of the COVID-19 pandemic in children: the double burden of undernutrition and overnutrition. Int J Equity Health. 2021;20(1):44.

640. Zhang B, Zaman A, Silenzio V, Kautz H, Hoque E. The Relationships of Deteriorating Depression and Anxiety With Longitudinal Behavioral Changes in Google and YouTube Use During COVID-19: Observational Study. JMIR Ment Health. 2020;7(11):e24012.

641. Zhang J, Lu H, Zeng H, Zhang S, Du Q, Jiang T, et al. The differential psychological distress of populations affected by the COVID-19 pandemic. Brain Behav Immun. 2020;87:49-50.

642. Zhang J, Zhang Y, Huo S, Ma Y, Ke Y, Wang P, et al. Emotional Eating in Pregnant Women during the COVID-19 Pandemic and Its Association with Dietary Intake and Gestational Weight Gain. Nutrients. 2020;12(8).

643. Zhang J, Zhao A, Ke Y, Huo S, Ma Y, Zhang Y, et al. Dietary Behaviors in the Post-Lockdown Period and Its Effects on Dietary Diversity: The Second Stage of a Nutrition Survey in a Longitudinal Chinese Study in the COVID-19 Era. Nutrients. 2020;12(11).

644. Zhang SX, Wang Y, Rauch A, Wei F. Unprecedented disruption of lives and work: Health, distress and life satisfaction of working adults in China one month into the COVID-19 outbreak. Psychiatry Res. 2020;288:112958.

645. Zhao A, Li Z, Ke Y, Huo S, Ma Y, Zhang Y, et al. Dietary Diversity among Chinese Residents during the COVID-19 Outbreak and Its Associated Factors. Nutrients. 2020;12(6).

646. Zheng L, Miao M, Lim J, Li M, Nie S, Zhang X. Is Lockdown Bad for Social Anxiety in COVID-19 Regions?: A National Study in The SOR Perspective. Int J Environ Res Public Health. 2020;17(12).

647. Zhu S, Wu Y, Zhu CY, Hong WC, Yu ZX, Chen ZK, et al. The immediate mental health impacts of the COVID-19 pandemic among people with or without quarantine managements. Brain Behav Immun. 2020;87:56-8.

648. Zorcec T, Jakovska T, Micevska V, Boskovska K, Cholakovska VC. Pandemic with COVID-19 and Families with Children with Chronic Respiratory Diseases. Pril (Makedon Akad Nauk Umet Odd Med Nauki). 2020;41(2):95-101.

649. Zurlo MC, Cattaneo Della Volta MF, Vallone F. COVID-19 Student Stress Questionnaire: Development and Validation of a Questionnaire to Evaluate Students' Stressors Related to the Coronavirus Pandemic Lockdown. Front Psychol. 2020;11:576758.
